1 **The Epstein-Barr virus ubiquitin deconjugase BPLF1 regulates the activity**  
2 **of Topoisomerase II during virus replication**

3

4

5

6

7 Jinlin Li<sup>1,4</sup> Noemi Nagy<sup>1</sup>, Jiangnan Liu<sup>1</sup>, Soham Gupta<sup>1,5</sup>, Teresa Frisan<sup>2</sup> Thomas Hennig<sup>3</sup>,  
8 Donald P. Cameron<sup>1</sup>, Laura Baranello<sup>1</sup>, and Maria G. Masucci<sup>1§</sup>

9 <sup>1</sup>Department of Cell and Molecular Biology, Karolinska Institutet, S-17165, Stockholm,  
10 Sweden

11 <sup>2</sup>Department of Molecular Biology, Umeå Center for Microbial Research, Umeå University, S-  
12 90187 Umeå, Sweden

13 <sup>3</sup>Institute for Virology and Immunobiology, University of Würzburg, 97078 Würzburg,  
14 Germany

15 <sup>4</sup>Current address: Institute of Medical Biochemistry and Microbiology, Uppsala University, S-  
16 75121, Uppsala, Sweden

17 <sup>5</sup>Current address: Division of Clinical Microbiology, Department of Laboratory Medicine  
18 Karolinska Institutet, S-14152, Huddinge, Sweden.

19

20

21

22 Short title: Regulation of Topoisomerase-II by BPLF1

23

24 § Corresponding author: Maria G. Masucci, CMB, Biomedicum A6, Karolinska Institutet, S-  
25 17165, Stockholm, Sweden; e-post: [maria.masucci@ki.se](mailto:maria.masucci@ki.se)

26

## 27 **Abstract**

28 Topoisomerases are essential for the replication of herpesviruses but the mechanisms by which  
29 the viruses hijack the cellular enzymes are largely unknown. We found that topoisomerase-II  
30 (TOP2) is a substrate of the Epstein-Barr virus (EBV) ubiquitin deconjugase BPLF1. BPLF1  
31 selectively inhibited the ubiquitination of TOP2 following treatment with topoisomerase  
32 poisons, interacted with TOP2 $\alpha$  and TOP2 $\beta$  in co-immunoprecipitation and *in vitro* pull-down,  
33 stabilized Etoposide-trapped TOP2 cleavage complexes (TOP2cc) and promoted TOP2  
34 SUMOylation, which halted the DNA-damage response and reduced Etoposide toxicity.  
35 Induction of the productive virus cycle promoted the accumulation of TOP2 $\beta$ cc, enhanced  
36 TOP2 $\beta$  SUMOylation, and reduced Etoposide toxicity in lymphoblastoid cell lines carrying  
37 recombinant EBV encoding the active enzyme. Attenuation of this phenotype upon expression  
38 of a catalytic mutant BPLF1-C61A impaired viral DNA synthesis and virus release. These  
39 findings highlight a previously unrecognized function of BPLF1 in promoting non-proteolytic  
40 pathways for TOP2cc debulking that favor cell survival and virus production.

41

42

## 43 **Introduction**

44 Epstein–Barr virus (EBV) is a human gamma-herpesvirus that establishes life-long persistent  
45 infections in most adults worldwide. The virus has been implicated in the pathogenesis of a  
46 broad spectrum of diseases ranging from infectious mononucleosis (IM) to a variety of  
47 lymphoid and epithelial cell malignancies including both Hodgkin and non-Hodgkin  
48 lymphomas, undifferentiated nasopharyngeal carcinoma, and gastric cancer (Shannon-Lowe &  
49 Rickinson, 2019).

50 Like other herpesviruses, EBV establishes latent or productive infections in different cell types.  
51 In latency, few viral genes are expressed resulting in the production of proteins and non-coding  
52 RNAs that drive virus persistence and cell proliferation (Babcock et al., 1998). In contrast,  
53 productive infection requires the coordinated expression of a large number of immediate early,  
54 early and late viral genes, which leads to the assembly of progeny virus and death of the infected  
55 cells (Hammerschmidt & Sugden, 2013). Although much of the EBV-induced pathology has  
56 been attributed to viral latency, the importance of lytic products in the induction of chronic  
57 inflammation and malignant transformation is increasingly recognized (Munz, 2019), pointing  
58 to inhibition of virus replication as a useful strategy for preventing EBV associated diseases.

59 EBV replication is triggered by the expression of immediate early genes, which  
60 transcriptionally activates a variety of viral and host cell factors required for subsequent phases  
61 of the productive cycle (Countryman & Miller, 1985; Feederle et al., 2000; Murata, 2014).  
62 Among the cellular factors, DNA topoisomerase-I and -II (TOP1 and TOP2) were shown to be  
63 essential for herpesvirus DNA replication (Hammarsten et al., 1996; M Kawanishi, 1993; Wang  
64 et al., 2008), raising the possibility that topoisomerase inhibitors may serve as antivirals. Indeed,  
65 non-toxic concentrations of TOP1 and TOP2 inhibitors were shown to suppress EBV-DNA  
66 replication (M Kawanishi, 1993), and different TOP1 inhibitors reduced the transcriptional

67 activity of the EBV immediate-early protein BZLF1 and the assembly of viral replication  
68 complexes (Wang et al., 2009). However, the mechanisms by which the virus harnesses the  
69 activity of these essential cellular enzymes remain largely unknown.

70 Topoisomerases sustain DNA replication, recombination and transcription by inducing  
71 transient single or double-strand DNA breaks that allow the resolution of topological problems  
72 arising from strand separation (Champoux, 2001; Wang, 2002). TOP2 homodimers mediate  
73 DNA disentanglement by inducing transient double strand-breaks (DSBs) through the  
74 formation of enzyme-DNA adducts, known as TOP2 cleavage complexes (TOP2ccs), between  
75 catalytic tyrosine residues and the 5' ends of the DSBs (Nitiss, 2009). Following the passage of  
76 the second DNA strand, TOP2 rejoins the DNA ends via reversion of the trans-esterification  
77 reaction. While TOP2-induced DSBs are relatively frequent in genomic DNA (Morimoto et al.,  
78 2019), failure to resolve TOP2ccs, as may occur upon endogenous or chemical stress that  
79 inhibits TOP2 activity, results in the formation of stable TOP2-DNA adducts that hinder DNA  
80 replication and transcription and trigger apoptotic cell death (Kaufmann, 1998). Thus, cellular  
81 defense mechanisms attempt to resolve the TOP2ccs via proteolytic or non-proteolytic  
82 mechanisms (Sun, Saha, et al., 2020). These may involve the displacement of TOP2 via  
83 ubiquitin (Mao et al., 2001) or SUMO and ubiquitin-dependent (Sun, Miller Jenkins, et al.,  
84 2020) proteasomal degradation, which, following the removal of residual peptide-DNA adducts  
85 by the Tyrosyl-DNA phosphodiesterase-2 (TDP2) resolving enzyme (Gao et al., 2014;  
86 Pommier et al., 2014), unmask the DNA breaks and promotes activation of the DNA damage  
87 response (DDR) (Pommier et al., 2014). Alternatively, SUMOylation may induce  
88 conformational changes in the TOP2 dimer that expose the covalent bonds to the direct action  
89 of TDP2 (Schellenberg et al., 2017). Two TOP2 isozymes expressed in mammalian cells share  
90 ~70% sequence identity and have similar catalytic activities and structural features but are  
91 differentially regulated and play distinct roles in biological processes (Nitiss, 2009). While

92 TOP2 $\alpha$  is preferentially expressed in dividing cells and is essential for decatenating intertwined  
93 sister chromatids during mitosis (Chen et al., 2015), TOP2 $\beta$  is the only topoisomerase expressed  
94 in non-proliferating cells and is indispensable for transcription (Madabhushi,  
95 2018)(McKinnon, 2016).

96 Ubiquitin-specific proteases, or deubiquitinating enzymes (DUBs), regulate protein turnover by  
97 disassembling poly-ubiquitin chains that target the substrate for proteasomal degradation  
98 (Komander, 2009). Several human and animal viruses encode DUB homologs that play  
99 important roles in the virus life cycle by promoting viral genome replication and inhibiting the  
100 host antiviral response (Bailey-Elkin et al., 2017; Gastaldello et al., 2010; Kattenhorn et al.,  
101 2005). In this study, we report that TOP2 interacts with and is a substrate of the DUB encoded  
102 in the N-terminal domain of the EBV large tegument protein BPLF1 and provide evidence for  
103 the capacity of BPLF1 to promote non-proteolytic pathways for the resolution of TOP2ccs,  
104 which enhances cell survival and virus replication.

105

## 106 **Results**

107 *BPLF1 selectively inhibits the degradation of TOP2 in cells treated with*  
108 *topoisomerase poisons*

109 To investigate whether the EBV encoded DUB regulates the proteasomal degradation of  
110 topoisomerases, FLAG-tagged versions of the 325 amino acid long N-terminal catalytic domain  
111 of BPLF1 and an inactive mutant where the catalytic Cys61 was substituted with Ala (BPLF1-  
112 C61A) were stably expressed by lentivirus transduction in HEK-293T cells under the control  
113 of a Tet-on regulated promoter (HEK-rtTA-BPLF1/BPLF1-C61A cell lines). Inducible  
114 expression was monitored by probing immunoblots of cells treated for 24 h with increasing  
115 concentration of doxycycline (Dox) with antibodies to the FLAG or V5 tags (Fig. S1A).  
116 Although the steady-state levels of BPLF1-C61A appeared to be lower, which may be due to  
117 rapid turnover, both polypeptides were readily detected by anti-FLAG immunofluorescence in  
118 approximately 50% of the induced cells, while the fluorescence was weak or below detection  
119 in the remaining cells (Fig. S1B).

120 To monitor ubiquitin-dependent proteasomal degradation, HEK-rtTA-BPLF1/BPLF1-C61A  
121 cells cultured overnight in the presence or absence of Dox were treated with the TOP1 poison  
122 Camptothecine or the TOP2 poison Etoposide in the presence or absence of the proteasome  
123 inhibitor MG132, and topoisomerase levels were assessed by western blot. Camptothecine and  
124 Etoposide trap TOP1-DNA and TOP2-DNA covalent adducts, respectively (Pommier, 2013),  
125 while MG132 prevents the proteasomal degradation of stalled topoisomerase-DNA  
126 intermediates (Mao et al., 2001). As expected, TOP1 was efficiently degraded in  
127 Camptothecine treated cells (Fig. 1A and Fig. 1C upper panels), while treatment with  
128 Etoposide promoted the degradation of both TOP2 $\alpha$  and TOP2 $\beta$  (Fig. 1B and 1C middle and

129 lower panels). The degradation was inhibited by treatment with MG132, confirming the  
 130 involvement of the proteasome in the clearance of poisoned topoisomerases. Expression of wild  
 131 type or mutant BPLF1 did not affect the Camptothecine-induced degradation of TOP1. In  
 132 contrast, expression of BPLF1 was accompanied by stabilization of both TOP2 $\alpha$  and TPO2 $\beta$  in  
 133 Etoposide-treated cells, while the mutant BPLF1-C61A had no effect. Thus, the viral DUB  
 134 selectively inhibits the degradation of TOP2 isozymes by the proteasome.  
 135

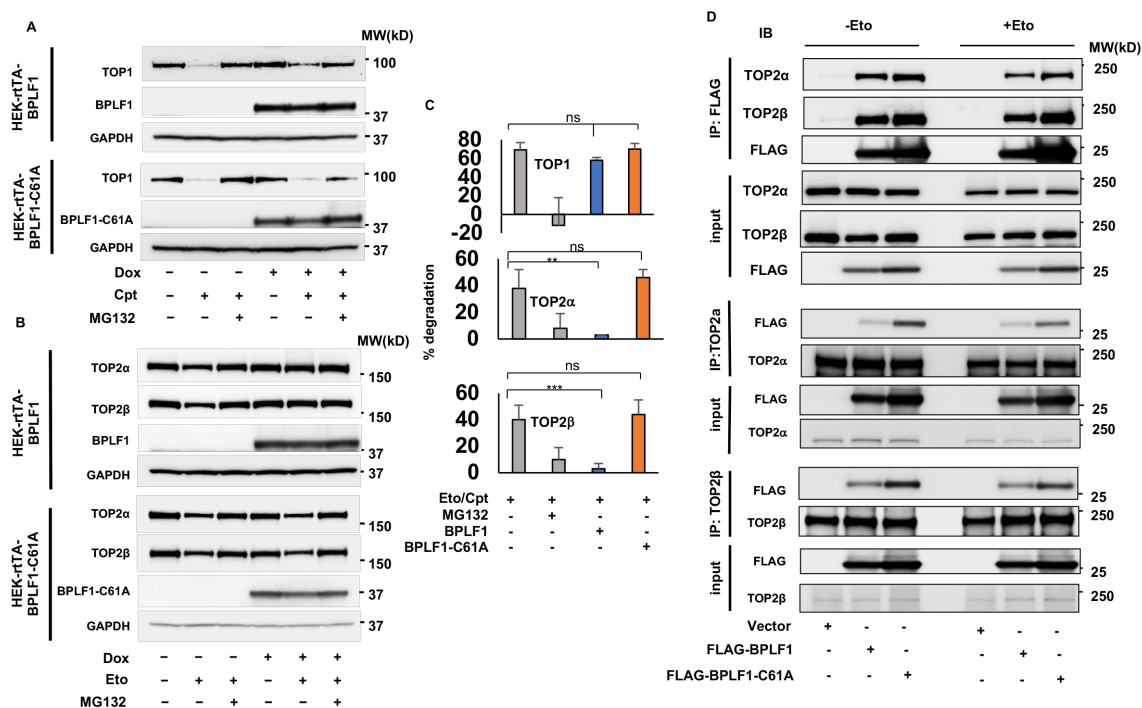

136 **Figure 1. BPLF1 selectively binds to TOP2 and inhibits the degradation of TOP2 in cells**  
 137 **treated with topoisomerase poisons. HEK-293T cell expressing inducible FLAG-BPLF1 or**  
 138 **FLAG-BPLF1-C61A were seeded into 6 well plates and treated with 1.5  $\mu$ g/ml doxycycline**  
 139 **(Dox) for 24 h. After treatment for 3 h with 5  $\mu$ M of the TOP1 poison Camptothecine (Cpt) or**  
 140 **6 h with 40  $\mu$ M of the TOP2 poison Etoposide (Eto) with or without the addition of 10  $\mu$ M**  
 141 **MG132, protein expression was analyzed in western blots probed with the indicated antibodies.**  
 142 **GAPDH was used as the loading control. (A) Representative western blots illustrating the**

143 *expression of TOP1 in control and Camptothecine treated cells. The treatment induced*  
144 *degradation of TOP1 by the proteasome, which was not affected by the expression of BPLF1*  
145 *or BPLF1-C61A in Dox treated cells. (B) Representative western blots illustrating the*  
146 *expression of TOP2 $\alpha$  and TOP2 $\beta$  in Etoposide treated cells. Expression of BPLF1 reduced the*  
147 *Etoposide-induced degradation of both TOP2 $\alpha$  and TOP2 $\beta$  while BPLF1-C61A had no*  
148 *appreciable effect. (C) The percentage degradation of TOP1, TOP2 $\alpha$  and TOP2 $\beta$  in*  
149 *Camptothecine or Etoposide treated cells versus untreated controls was calculated from the*  
150 *intensity of the specific bands recorded in two (TOP1) or three (TOP2 $\alpha$  and TOP2 $\beta$ )*  
151 *independent experiments using the ImageJ software. Data from HEK-rtTA-BPLF1/BPLF1-*  
152 *C61A cultured in the absence of Dox were pulled. Statistical analysis was performed using*  
153 *Student's t-test. \*\* $P < 0.01$ ; \*\*\* $P < 0.001$ ; ns, not significant. (D) HEK293T cells transfected*  
154 *with FLAG-BPLF1, FLAG-BPLF1-C61A, or FLAG-empty vector were treated with 40  $\mu$ M*  
155 *Etoposide for 30 min and cell lysates were either immunoprecipitated with anti-FLAG*  
156 *conjugated agarose beads or incubated for 3 h with anti-TOP2 $\alpha$  or TOPO2 $\beta$  antibodies*  
157 *followed by the capture of immunocomplexes with protein-G coated beads. Catalytically active*  
158 *and inactive BPLF1 binds to both TOP2 $\alpha$  and TOP2 $\beta$  in both untreated and Etoposide treated*  
159 *cells (upper panels). Conversely, TOP2 $\alpha$  (middle panels) and TOP2 $\beta$  (lower panels) interacts*  
160 *with both catalytically active and inactive BPLF1. Representative western blots from one of*  
161 *two independent experiments where all conditions were tested in parallel are shown.*

162

### 163 *TOP2 is a BPLF1 substrate*

164 To assess whether topoisomerases are direct substrates of BPLF1, we first investigated whether  
165 they interact in cells and in pull-down assays performed with recombinant proteins. Lysates of



166 HEK-293T cells transiently transfected with FLAG-BPLF1 or FLAG-BPLF-C61A were  
167 immunoprecipitated with antibodies recognizing FLAG, TOP1, TOP2 $\alpha$  or TOP2 $\beta$ . In line with  
168 the failure to rescue Camptothecine-induced degradation, BPLF1 did not interact with TOP1  
169 (Fig. S2A), whereas both TOP2 $\alpha$  and TOP2 $\beta$  were readily detected in western blots of the  
170 FLAG immunoprecipitates and, conversely, BPLF1 was strongly enriched in the TOP2 $\alpha$  and  
171 TOP2 $\beta$  immunoprecipitates indicating that the proteins interact in cells (Fig. 1D). Of note, co-  
172 immunoprecipitation was more efficient when BPLF1-C61A was the bait, suggesting that  
173 TOP2 may be a substrate of the viral enzyme.

174 To gain insight on the nature of the interaction, equimolar concentration of yeast expressed  
175 FLAG-TOP2 $\alpha$ , or a TOP2 $\alpha$  mutant lacking the unique C-terminal domain that is not conserved  
176 in the TOP2 $\beta$  isozyme, FLAG-TOP2 $\alpha$ - $\Delta$ CTD, were mixed with bacterially expressed His-  
177 BPLF1 and reciprocal pull-downs were performed with anti-FLAG (Fig. S2B) or Ni-NTA  
178 coated beads (Fig. S2C). A weak BPLF1 band was reproducibly detected in western blots of  
179 the FLAG-TOP2 $\alpha$  pull-downs probed with a His-specific antibody and, conversely, a weak  
180 FLAG-TOP2 $\alpha$  band was detected in the His pull-downs. The binding of BPLF1 to TOP2 $\alpha$  was  
181 not affected by deletion of the TOP2 $\alpha$  C-terminal domain (Fig. S2D), pointing to a TOP2 $\alpha$  and  
182 TOP2 $\beta$  shared domain shared as the likely site of interaction. Notably, comparison of the  
183 efficiency of *in vitro* pull-down versus co-immunoprecipitation suggests that binding may be  
184 stabilized by factors or TOP2 modifications that are only present in cell lysates.

185 To further investigate whether the viral DUB deubiquitinates TOP2, BPLF1, TOP2 $\alpha$  and  
186 TOP2 $\beta$  were immunoprecipitated from lysates of control and Etoposide-treated HEK-293T  
187 cells transiently transfected with BPLF1 or BPLF1-C61A and western blots were probed with  
188 a ubiquitin-specific antibody. The cell lysates were prepared under denaturing conditions to  
189 exclude non-covalent protein interactions and working concentrations of NEM and

190 iodoacetamide were added to all buffers to inhibit DUB activity. In line with the capacity of  
 191 Etoposide to promote the proteasomal degradation of TOP2, smears of high molecular weight  
 192 species corresponding to ubiquitinated TOP2 $\alpha$  and TOP2 $\beta$  were detected in the  
 193 immunoprecipitates of Etoposide-treated cells (Fig. 2A). The intensity of the smears was  
 194 strongly decreased in cells expressing catalytically active BPLF1, while the mutant BPLF1-  
 195 C61A had no appreciable effect, confirming that TOP2 is a bona-fide BPLF1 substrate.

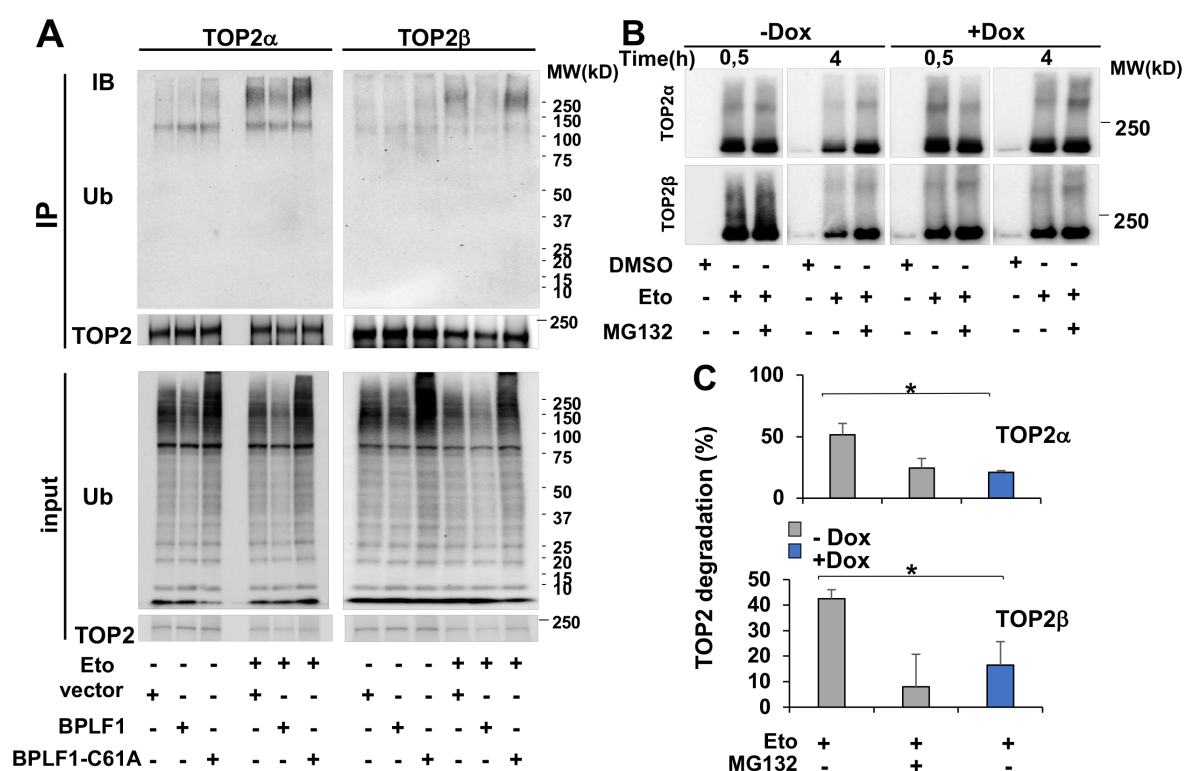

196 **Figure 2. BPLF1 deubiquitinates TOP2 and stabilizes TOP2cc.** (A) HEK293T cells were  
 197 transiently transfected with plasmids expressing FLAG-BPLF1, FLAG-BPLF1-C61A, or the  
 198 empty FLAG vector, and aliquots were treated with 40  $\mu$ M Etoposide for 30 min. TOP2 $\alpha$  and  
 199 TOP2 $\beta$  were immunoprecipitated from cell lysates prepared under denaturing conditions in the  
 200 presence of DUB inhibitors and western blots were probed with antibodies to TOP2 $\alpha$ , TOP2 $\beta$   
 201 and ubiquitin. The expression of catalytically active BPLF1 inhibits the ubiquitination of  
 202 TOP2 $\alpha$  and TOP2 $\beta$  in Etoposide treated cells. Western blots from one representative  
 203 experiment out of three are shown in the figure. (B) HEK-rtTA-BPLF1 cells were treated with

204 *1.5 µg/ml Dox for 24 h followed by treatment with 80 µM Etoposide for the indicated time with*  
205 *or without the addition of 10 µM MG132. RADAR assays were performed as described in*  
206 *Materials and Methods and TOP2 trapped in 10 µg DNA was detected in western blots using*  
207 *antibodies to TOP2α or TOP2β. Trapped TOP2 appeared as a major band of the expected size*  
208 *and a smear of higher molecular weight species. The intensity of the trapped TOP2α and*  
209 *TOP2β bands decrease over time in control untreated cells due to proteasomal degradation,*  
210 *while the decrease was significantly reduced upon expression of BPLF1 in Dox treated cells.*  
211 *Western blots from one representative experiment out of two are shown in the figure. (C) The*  
212 *percentage of Etoposide-induced TOP2 degradation was calculated from the intensity of the*  
213 *specific bands measured with the ImageJ software. MG132 prevented the degradation of*  
214 *TOP2α and TOP2β trapped into TOP2cc in control BPLF1 negative cells whereas TOP2*  
215 *degradation was significantly reduced in BPLF1 expressing cells. The mean ± SD of two*  
216 *independent experiments is shown in the figure.*

217  
218 Degradation of TOP2 by the proteasome plays an important role in the debulking of persistent  
219 TOP2ccs generated by topoisomerase poisons. To investigate whether the viral DUB may  
220 interfere with this process, HEK-rtTA-BPLF1 cells cultured for 24 h in the presence or absence  
221 of Dox were treated for 30 min or 4 h with Etoposide with or without addition of MG132, and  
222 DNA-trapped TOP2 was detected by RADAR (rapid approach to DNA adduct recovery) assays  
223 (Anand et al., 2018). Neither TOP2α nor TOP2β were detected in control DMSO treated cells  
224 confirming that only covalently DNA-bound species are isolated by this method (Fig. 2B). In  
225 Etoposide treated cells, TOP2α and TOP2β appeared as major bands of the expected size and  
226 smears of high molecular weight species that are likely to correspond to different types of post-  
227 translational modifications. Comparable amounts of trapped TOP2α and TOP2β were detected

228 in cells treated with Etoposide for 30 min, independently of BPLF1 expression or MG132  
229 treatment, indicating that neither treatment, either alone or in combination, affects the formation  
230 of TOP2ccs. As expected, the intensity of the TOP2 band decreased after Etoposide treatment  
231 for 4 h, which was inhibited by MG132, confirming the involvement of proteasome-dependent  
232 degradation in the debulking of Etoposide-induced TOP2ccs. The degradation of both TOP2 $\alpha$   
233 and TOP2 $\beta$  was significantly decreased at the 4 h time point in Dox treated cells, resulting in  
234 levels of stabilization comparable to those achieved by treatment with MG132 (Fig. 2C). Thus,  
235 BPLF1 deubiquitinates and stabilizes TOP2 trapped in covalent DNA adducts. The finding was  
236 independently confirmed in experiments where TOP2ccs were stabilized by alkaline lysis (Ban  
237 et al., 2013) (Fig. S3A). Smears of high molecular weight species were readily detected above  
238 the main TOP2 $\beta$  band in Dox-induced Etoposide-treated HEK-rtTA-BPLF1 cells, whereas high  
239 molecular weight species were not detected when the blots were probed with a TOP1 specific  
240 antibody, confirming that the high molecular weight species correspond to DNA-trapped TOP2  
241 (Fig. S3A). As expected, the intensity of the high molecular weight species decreased with time  
242 in BPLF1 negative cells, and the decrease was inhibited by MG132 confirming the involvement  
243 of proteasomal degradation. In cells expressing catalytically active BPLF1, the intensity of the  
244 high molecular weight species remained virtually constant over the observation time, resulting  
245 in significantly higher amounts of residual TOP2ccs (Fig. S3B). Similar results were obtained  
246 when the blots were probed with antibodies to TOP2 $\alpha$ .

247 *BPLF1 inhibits the detection of Etoposide-induced DNA damage and promotes*  
248 *TOP2 SUMOylation and cell survival*

249 The removal of TOP2 trapped in TOP2ccs induces a DNA damage response (DDR) that, while  
250 limiting Etoposide toxicity, may also promote genomic instability and apoptosis (Lee et al.,  
251 2016; Mao et al., 2001; Sciascia et al., 2020). To test whether the capacity of BPLF1 to stabilize

252 TOP2ccs interferes with DDR activation, HEK-rtTA-BPLF1/BPLF-C61A cells cultured in the  
 253 presence or absence of Dox for 24 h and then treatment with Etoposide for 1 h. The  
 254 accumulation of phosphorylated histone H2AX ( $\gamma$ H2AX), a validated DDR marker (Mah et al.,  
 255 2010), was monitored by immunofluorescence in BPLF1 positive and negative cells. As  
 256 illustrated by representative fluorescence micrographs (Fig. 3A, upper panels) and plots of  
 257 fluorescence intensity in BPLF1 positive and negative cells (Fig. 3B, upper panels), a diffuse  
 258  $\gamma$ H2AX fluorescence was readily detected in Etoposide-treated BPLF1 negative cells and in  
 259 cells expressing the mutant BPLF-C61A.

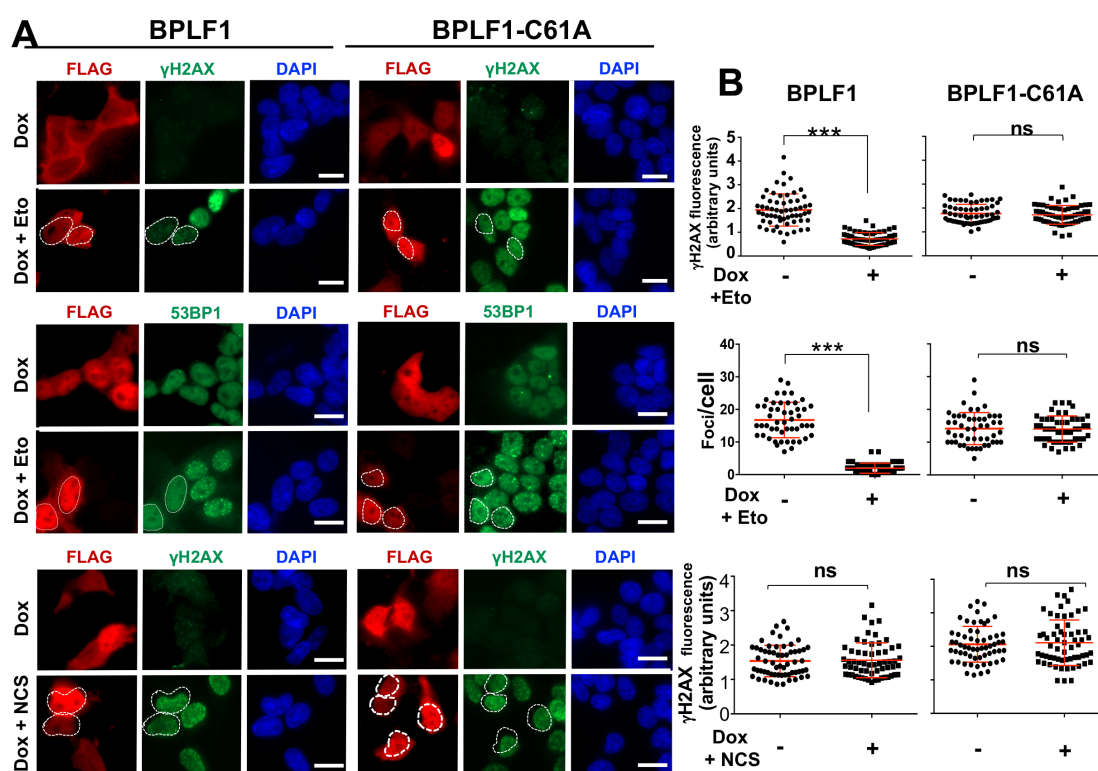

260

261 **Figure 3. BPLF1 selectively inhibits the detection of TOP2-induced DNA damage.** HEK-  
 262 rtTA-BPLF1/BPLF1-C61A cells grown on cover-slides were treated with 1.5  $\mu$ g/ml Dox for 24  
 263 h to induce the expression of BPLF1 followed by treatment for 1 h with 40  $\mu$ M Etoposide or  
 264 0.5  $\mu$ g/ml of the radiomimetic Neocarzinostatin (NCS) before staining with the indicated  
 265 antibodies. (A) The cells were co-stained with antibodies against FLAG (red) and antibodies

266 to  $\gamma$ H2AX or 53BP1 (green) and the nuclei were stained with DAPI (blue). Expression of the  
267 catalytically active BPLF1 was associated with a significant decrease of nuclear  $\gamma$ H2AX  
268 fluorescence and decreased formation of 53BP1 foci while the BPLF1-C61A mutant had no  
269 effect. Neither the catalytically active nor the inactive BPLF1 affected the induction of  $\gamma$ H2AX  
270 in cells treated with NCS. Representative micrographs from one out of two experiments where  
271 all conditions were tested in parallel are shown. Scale bar = 10  $\mu$ m. **(B)** Quantification of  
272  $\gamma$ H2AX fluorescence intensity and 53BP1 foci in BPLF1/BPLF1-C61A positive and negative  
273 cells from the same image. The Mean  $\pm$  SD of fluorescence intensity in at least 50 BPLF1-  
274 positive and 50 BPLF1-negative cells recorded in each condition is shown. Statistical analysis  
275 was performed using Student's *t*-test. \*\*\**P* < 0.001; ns, not significant.

276

277 Cells expressing active BPLF1 showed significantly weaker  $\gamma$ H2AX fluorescence, suggesting  
278 that the viral enzyme counteracts DDR activation. Accordingly, DNA repair was not triggered  
279 as assessed by the impaired formation of 53BP1 foci in BPLF1 positive compared to negative  
280 cells (Fig. 3A and 3B, middle panels). A comparable BPLF1-dependent decrease of  $\gamma$ H2AX  
281 fluorescence and formation of 53BP1 and BRCA1 foci was observed upon Etoposide treatment  
282 in HeLa cells transiently transfected with BPLF1/BPLF1-C61A (Fig. S4), confirming that the  
283 effect is not cell-type specific. To assess whether the failure to activate the DDR may be due to  
284 the capacity of BPLF1 to target events downstream of the formation of DSBs, cells expressing  
285 BPLF1/BPLF1-C61A were treated with the radiomimetic agent Neocarzinostatin (NCS)  
286 (Povirk, 1996). Neither BPLF1 nor BPLF1-C61A altered the induction of  $\gamma$ H2AX in NCS  
287 treated cells (Fig. 3A and 3B, lower panels). Thus, BPLF1 selectively inhibits the DDR and  
288 DNA repair responses triggered by Etoposide-induced DSBs.

289 In the absence of TOP2 degradation, TOP2cc may be resolved via a non-proteolytic process  
 290 whereby SUMOylation-dependent conformational changes expose the tyrosyl-DNA bond to  
 291 the activity of Tyrosyl-DNA-phosphodiesterase-2 (TDP2), which enables DSBs repair without  
 292 the need of nuclease activity (Schellenberg et al., 2017). To assess whether this pathway may  
 293 be engaged in BPLF1 expressing cells, Dox-treated HEK-rtTA-BPLF1 cells were exposed to  
 294 Etoposide for 30 min and western blots of TOP2ccs isolated by RADAR were probed with  
 295 antibodies to ubiquitin and SUMO2/3. As expected, smears of high molecular weight species  
 296 reacting with both ubiquitin- and SUMO2/3-specific antibodies were highly enriched in  
 297 Etoposide treated cells (Fig. 4A).

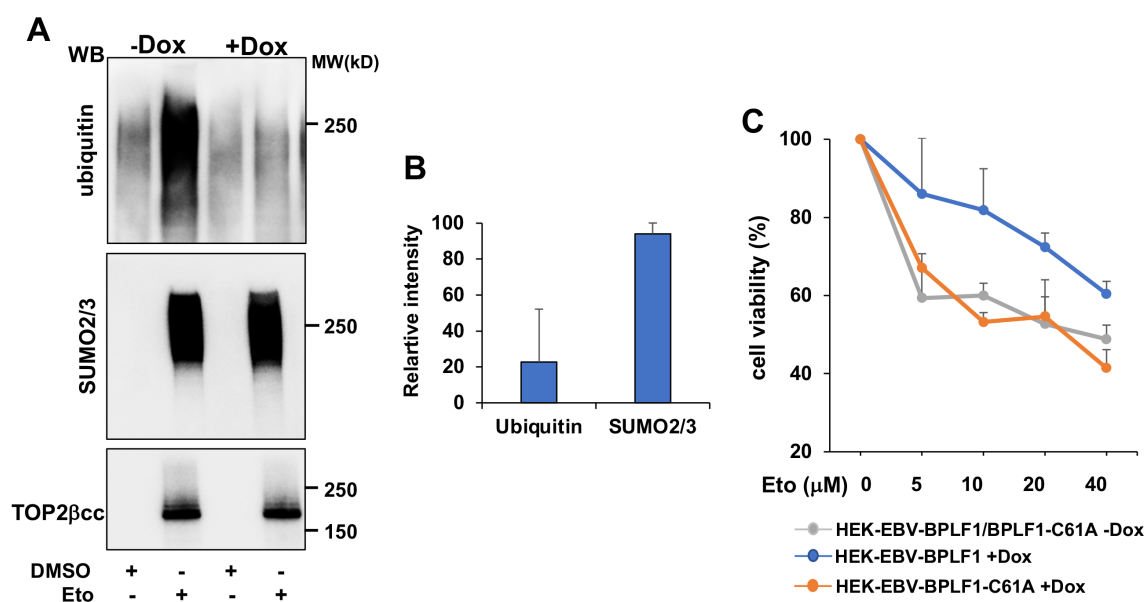

298 **Figure 4. BPLF1 promotes TOP2 SUMOylation and cell viability following Etoposide**  
 299 **treatment.** (A) HEK-rtTA-BPLF1 cells were cultured for 24 h in the presence or absence of 1.5  
 300 μg/ml Dox and then treated with 80 μM Etoposide for 30 min followed by detection of DNA  
 301 trapped TOP2 by RADAR assay. Western blots of proteins bound to 10 μg DNA were probed  
 302 with antibodies to ubiquitin, SUMO2/3 and TOP2. The expression of BPLF1 was associated  
 303 with strongly decreased ubiquitination of the TOP2ccs while SUMOylation was only  
 304 marginally affected. (B) The intensity of the ubiquitin, SUMO2/3 and TOP2βcc specific bands

305 *was quantified by densitometry using the ImageJ software. Relative intensity was calculated as*  
306 *the % intensity in Dox-treated versus untreated cells after normalization to TOP2cc. Mean  $\pm$*   
307 *SD of two independent experiments. (C) HEK-rtTA-BPLF1/BPLF1-C61A cells were cultured*  
308 *for 24 h in the presence or absence of 1.5  $\mu$ g/ml Dox and then treated overnight with the*  
309 *indicated concentration of Etoposide before assessing cell viability by MTT assays. The*  
310 *expression of catalytically active BPLF1 decreased the toxic effect of Etoposide over a wide*  
311 *range of concentrations while BPLF1-C61A had no appreciable effect. The mean  $\pm$  SD of two*  
312 *independent experiments is shown.*

313

314 Although the formation of TOP2ccs was not affected (Fig. 4A, lower panel), expression of the  
315 viral DUB was accompanied by a dramatic decrease of ubiquitinated species, while the intensity  
316 of the SUMO2/3 smear was largely unaffected (Fig 4A upper and middle panels and 4B). Thus,  
317 in addition to preventing the detection of TOP2-induced DNA damage, by inhibiting TOP2  
318 ubiquitination BPLF1 may shift the processing of TOP2ccs towards non-proteolytic pathways,  
319 which could counteract the toxic effect of Etoposide. To test this possibility, cell viability was  
320 assessed by Thiazolyl blue tetrazolium bromide (MTT) assays in untreated and Dox-induced  
321 HEK-rtTA-BPLF1/BPLF1-C61A cells following overnight exposure to increasing  
322 concentrations of Etoposide. Similar levels of cell viability were observed in cells treated with  
323 Etoposide in the absence of Dox whereas, in line with the hypothesized protective effect of  
324 BPLF1, cell viability was consistently improved in cells expressing the active enzyme over a  
325 wide range of Etoposide concentrations and the BPLF1-C61A mutant had no appreciable effect  
326 (Fig. 4C).

327



### 328 *BPLF1 regulates the activity of TOP2 $\beta$ during productive infection*

329 In the final set of experiments, we asked whether physiological levels of BPLF1 regulate the  
 330 activity of TOP2 during the productive virus cycle in EBV infected cells. To this end, infectious  
 331 virus rescued from HEK-293-EBV cells carrying recombinant EBV expressing wild type or  
 332 mutant BPLF1 (Gupta et al., 2018) was used to transform normal B-lymphocytes into  
 333 immortalized lymphoblastoid cell lines (LCL-EBV-BPLF1/BPLF1-C61A). To optimize the  
 334 induction of the productive virus cycle, the LCLs were stably transduced with a recombinant  
 335 lentivirus expressing the viral transactivator BZLF1 under the control of a tetracycline-  
 336 regulated promoter. Treatment with Dox induced the expression of early (BMRF1) and late  
 337 (BFRF3) viral antigens detected in western blots probed with specific antibodies (Fig. S5A),  
 338 and BPLF1 mRNA detected by qPCR (Fig. S5B). Of note, the induction of late antigens was  
 339 consistently weaker in LCL-EBV-BPLF1-C61A (Fig. S5A), pointing to impairment of the late  
 340 phase of the virus cycle

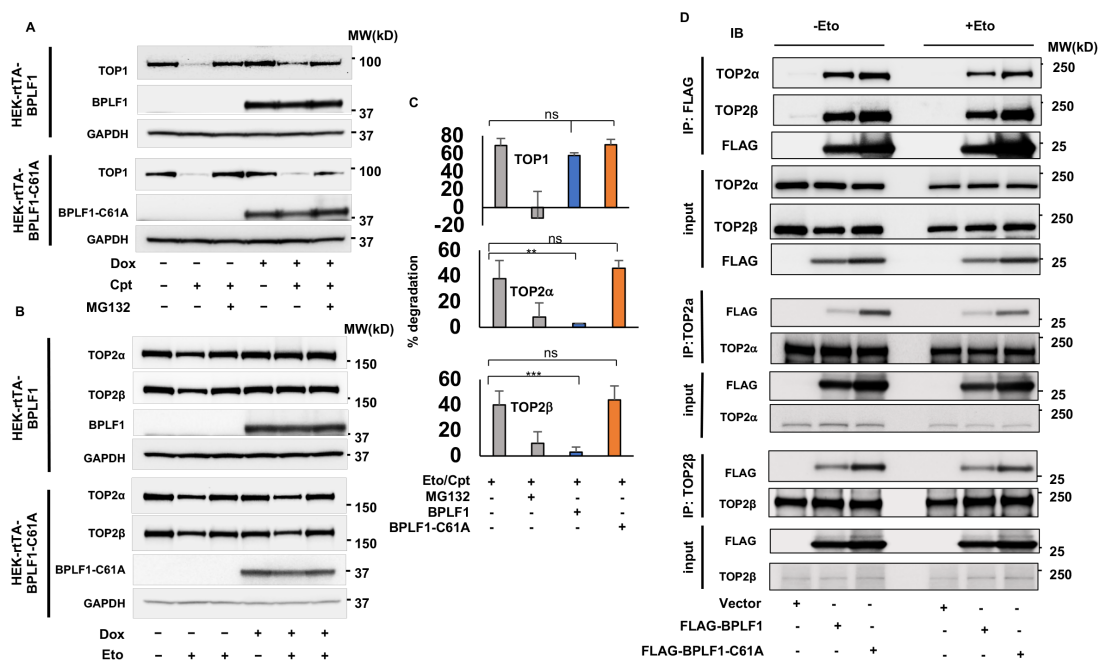

341

342 **Figure 5. BPLF1 regulates the expression and activity of TOP2 $\beta$  during productive infection.**

343 *The productive virus cycle was induced by treatment with 1.5 mg/ml Dox in LCL cells carrying*  
344 *recombinant EBV encoding wild type or catalytic mutant BPLF1 and expressing a tetracycline*  
345 *regulated BZLF1 transactivator. (A) The expression of TOP2 $\alpha$  and TOP2 $\beta$  was assessed by*  
346 *western blot and the intensity of the specific bands was quantified using the ImageJ software.*  
347 *Induction of the productive cycle was associated with a highly reproducible downregulation of*  
348 *TOP2 $\alpha$  while TOP2 $\beta$  was either unchanged or slightly increased. The effect was stronger in*  
349 *cells expressing wild type BPLF1. Representative western blots and quantification of specific*  
350 *bands in three to five independent experiments are shown. (B) The formation of TOP2bcc was*  
351 *investigated by RADAR assays in untreated and induced LCLs. Representative western blot*  
352 *illustrating the significant increase of TOP2bcc upon induction of the productive virus cycle in*  
353 *LCL cells expressing catalytically active BPLF1. BPLF1-C61A had no appreciable effect. One*  
354 *representative western blots and quantification of the intensity of the TOP2b smears in three*  
355 *independent experiments are shown. Fold increase was calculated as the ratio between the*  
356 *smear intensity in control versus induced cells. \*P<0.05. (C) TOP2 $\beta$  was immunoprecipitated*  
357 *from total cell lysates of control and induced LCLs and western blots were probed with*  
358 *antibodies to TOP2 $\beta$ , ubiquitin and SUMO2/3. Western blots illustrating the decreased*  
359 *ubiquitination and increased SUMOylation of TOP2 $\beta$  in cells expressing catalytically active*  
360 *BPLF1. One representative experiment out of three is shown. (D) The intensity of the bands*  
361 *corresponding to immunoprecipitated TOP2 $\beta$ , ubiquitinated and SUMOylated species was*  
362 *quantified using the ImageJ software and the SUMO/Ub ratio was calculated after*  
363 *normalization to the intensity of immunoprecipitated TOP2b. The mean  $\pm$  SD of three*  
364 *independent experiments is shown. \*P<0.05. (E) The productive cycle was induced in LCL-*  
365 *EBV-BPLF1/BPLF1-C61A by culture for 72 h in the presence 1.5  $\mu$ g/ml Dox. After washing*  
366 *and counting,  $5 \times 10^4$  live cells were seeded in triplicate wells of 96 well plates and treated*

367 *overnight with the indicated concentration Etoposide before assessing cell viability by MTT*  
368 *assays. The expression of catalytically active BPLF1 enhanced cell viability over a wide range*  
369 *of Etoposide concentration with BPLF1-C61A had no appreciable effect. The mean  $\pm$  SD of*  
370 *cell viability in three independent experiments is shown. (F) The amount of cell associated and*  
371 *release EBV DNA was measures in the cell pellets ad supernatants after induction for 72 h.*  
372 *Fold induction was calculated relative to uninduced cells. Mean  $\pm$  DS of 3 experiments.*

373

374 Consistent with the establishment of a pseudo-S-phase where progression to G2/M is blocked  
375 and cellular DNA synthesis is inhibited (Kudoh et al., 2003), induction of the productive cycle  
376 was associated with a strong decrease of TOP2 $\alpha$  mRNA (Fig. S5C) and protein levels (Fig. 5A)  
377 while TOP2 $\beta$  protein and mRNA showed either no change or a small increase of protein levels  
378 in cells expressing catalytically active BPLF1 (Fig. 5A and S5C). This was associated with a  
379 significant increase of TOP2 $\beta$ ccs relative to uninduced cells or cells expressing the mutant  
380 BPLF1-C61A (Fig. 5B), and with decreased TOP2 $\beta$  ubiquitination (Fig. 5C top panel). As  
381 previously reported, higher molecular weight species detected by the SUMO2/3 specific  
382 antibody were increased in induced cells due to viral micro-RNA-dependent downregulation of  
383 RNF4(Li et al., 2017). SUMOylated species were also increased in immunoprecipitated TOP2 $\beta$   
384 (Fig. 5C lower panel), resulting in a significant shift of the SUMO/ubiquitin ratio towards  
385 TOP2 $\beta$  SUMOylation in cells expressing catalytically active BPLF1 (Fig. 5D). As observed  
386 with the inducible HEK-rtTA-BPLF1 cell line, expression of the active viral DUB counteracted  
387 the toxic effect of Etoposide (Fig. 5E). Furthermore, the BPLF1-mediated regulation of TOP2 $\beta$   
388 expression and ubiquitination was associated with higher levels of viral DNA replication and  
389 efficient release of infectious virus particles as measured by qPCR in cell pellets and culture  
390 supernatants (Fig. 5F).

## 391 **Discussion**

392 Although compelling evidence points to a pivotal role of topoisomerases in the replication of  
393 herpesviruses and other DNA viruses (M. Kawanishi, 1993; Wang et al., 2009; Wang et al.,  
394 2008), very little is known about the mechanisms by which the viruses harness the activity of  
395 these cellular enzymes. In this study, we have shown that the ubiquitin deconjugases encoded  
396 in the N-terminal domain of the EBV large tegument protein BPLF1 regulates the activity of  
397 TOP2 $\beta$  during productive EBV infection by promoting the proteasome-independent debulking  
398 of TOP2-DNA adducts, which favors cell survival and the faithful replication and transcription  
399 of viral DNA. The findings highlight a previously unrecognized function of the viral enzyme  
400 in hijacking cellular functions that enable efficient virus production. Our proposed model for  
401 the activity of BPLF1 is shown in Fig. 6.

402 We found that the viral DUB that is physiologically released during productive infection via  
403 caspase-1-mediated cleavage of the EBV large tegument protein BPLF1 (Gastaldello et al.,  
404 2013) selectively binds to TOP2 $\alpha$  and TOP2 $\beta$ , and effectively counteracts their ubiquitination  
405 and proteasomal degradation in cells treated with Etoposide (Fig. 1, Fig 2A). In the absence of  
406 proteasomal degradation, TOP2ccs were stabilized (Fig 2B, 2C), which prevented the  
407 unmasking of TOP2-induced DSBs (Fig 3) and promoted resistance to the toxic effect of  
408 Etoposide (Fig 4C). Several lines of evidence suggest that the potent DDR triggered by the  
409 proteolytic debulking of TOP2ccs may be detrimental to cell survival and genomic integrity.  
410 Following the degradation of TOP2, protein-free DSBs engage multiple pathways for error-free  
411 or error-prone repair, including MRE11 nuclease-dependent homologous recombination  
412 (HR)(Hoa et al., 2016) and non-homologous end joining (NHRJ) (Gomez-Herreros et al., 2013;  
413 Gomez-Herreros et al., 2017). Recent findings suggest that a substantial fraction of the  
414 Etoposide induced DSBs undergo extensive DNA end-resection (Sciascia et al., 2020), which

415 favors mispairing and the occurrence of chromosomal rearrangements that compromise cell  
416 viability or promote genomic instability. Of note, these genotoxic effects were efficiently  
417 counteracted by inhibition of the proteasome prior or during Etoposide treatment, supporting  
418 the notion that the non-proteolytic resolution of TOP2ccs can minimize DSB misrepair and  
419 promote genomic integrity (Sciascia et al., 2020).

420

421 We found that expression of the catalytically active viral deubiquitinase closely mimicked the  
422 stabilization of TOP2ccs (Fig 2B) and inhibition of both DDR activation (Fig. 3) and Etoposide  
423 toxicity (Fig. 4C and 5E) observed upon inhibition of the proteasome. While in line with the  
424 notion that ubiquitination is strictly required for the targeting of substrates to the proteasome,  
425 this finding points to the capacity of BPLF1 to shift the cellular strategy for TOP2cc debulking  
426 towards proteasome-independent pathways that may ensure higher fidelity of DNA repair and  
427 reduce toxicity. In this context, it is important to notice that, while inhibiting ubiquitination,  
428 catalytic active BPLF1 did not affect the SUMOylation of TOP2cc in Etoposide treated cells  
429 (Fig. 4A) and promoted the preferential SUMOylation of TOP2 $\beta$  during productive EBV  
430 infection (Fig. 5C and 5D). SUMOylation plays multiple roles in the debulking of TOP2ccs. It  
431 may mediate TOP2 proteolysis by serving as a recognition signal for ubiquitination mediated  
432 by SUMO-targeted ubiquitin ligases such as RNF4 (Sun, Miller Jenkins, et al., 2020) or may  
433 recruit SprT-family metalloproteases, such as SPRTN (Lopez-Mosqueda et al., 2016) and  
434 ARC/GCNA (Borgermann et al., 2019), that are involved in the proteasome-independent  
435 proteolytic debulking of DNA-protein adducts. Interestingly, the activity of SPRTN is inhibited  
436 by mono-ubiquitination (Stingele et al., 2016) and yet unpublished findings suggest that failure  
437 to deubiquitinate SPRTN upon depletion of the cellular deubiquitinase USP11 leads to the  
438 accumulation of unrepaired DNA-protein adducts (Perry et al., 2020). Thus, BPLF1 could  
439 mimic the activity of the cellular DUB. In addition, SUMOylation of TOP2 by the ZNF451

440 ligase was shown to promote the non-proteolytic resolution of TOP2-DNA cross-links via  
441 direct recruitment of TDP2 through a “split-SIM” SUMO2 engagement platform (Schellenberg  
442 et al., 2017). SUMOylation was shown to alter the conformation of the trapped TOP2 dimers,  
443 thereby facilitating the access of TDP2 to the tyrosyl-DNA covalent bond and promoting error-  
444 free rejoining of the DSBs. This may be accomplished by the T4 DNA ligase (Gomez-Herreros  
445 et al., 2013) or, upon removal of Etoposide, by TOP2 (Sciascia et al., 2020).

446

447 While the pivotal role of topoisomerases in both the latent and lytic replication of herpesviruses  
448 is firmly established (Benson & Huang, 1988; Ebert et al., 1990; M Kawanishi, 1993), the roles  
449 of the individual enzymes are not well understood. The torsion-relieving activity of TOP1 was  
450 shown to be essential for reconstitution of the HSV replication machinery using purified viral  
451 proteins (Nimonkar & Boehmer, 2004), and its recruitment to the viral replication complex was  
452 required for the lytic origin (OriLyt)-driven replication of EBV (Wang et al., 2009) and KSHV  
453 (Wang et al., 2008). Less is known about the function of the TOP2 isozymes, although the  
454 importance of TOP2 is underscored by its upregulation during the productive cycle of HCMV  
455 (Benson & Huang, 1990) and KSHV (Wang et al., 2008) despite a general host proteins shutoff  
456 during virus replication. We have found that TOP2 $\alpha$  mRNA is strongly downregulated upon  
457 induction of the productive virus cycle in EBV infected cells (Fig. S5C) and the protein  
458 becomes virtually undetectable in cells expressing catalytically active BPLF1 (Fig. 5A). While  
459 possibly related to the virus-induced arrest of the cell cycle in G1/S, the precise mechanism of  
460 this downregulation remains unknown. Nevertheless, our findings exclude a major role of  
461 TOP2 $\alpha$  in the replication of the viral genome. In contrast, the expression of TOP2 $\beta$  was either  
462 not affected or slightly upregulated during productive infection, which is in line with the  
463 exclusive expression of this topoisomerase in resting cells and its essential role in transcription.  
464 Most importantly, we found that catalytically active BPLF1 was required for the accumulation

465 of TOP2 $\beta$ ccs in cell entering the productive cycle (Fig 5B), which, in the absence of  
466 topoisomerase poisons, is likely to indicate a significant increase of TOP2 $\beta$  activity driven by  
467 viral DNA replication and/or transcription. Conceivably, the capacity of BPLF1 to stabilize  
468 TOP2ccs and their resolution by non-proteolytic pathways that favor error-free repair and cell  
469 survival may be instrumental to ensure faithful and proficient replication and transcription of  
470 the viral genome. Of note, the BPLF1-mediated salvage of TOP2 $\beta$  from proteolytic disruption  
471 is likely to be reinforced by the concomitant downregulation of RNF4 (Li et al., 2017), which  
472 may ensure that sufficient levels of the protein remain available throughout the productive cycle  
473 to sustain efficient virus production.

474

475 Aberrant expression of BPLF1 in the context of abortive lytic cycle reactivation has been  
476 reported in EBV associated malignancies such as undifferentiated nasopharyngeal carcinoma,  
477 NK-T cell lymphomas, and a subset of gastric cancers (Peng et al., 2019),(Borozan et al., 2018).  
478 Etoposide and other topoisomerase poisons are used clinically as therapeutic anticancer agents  
479 against these malignancies (Delgado et al., 2018). Our data suggest that the expression of  
480 BPLF1 could be potentially used as a biomarker to predict the effectiveness of  
481 chemotherapeutic regimens that incorporate topoisomerase poison.

482

483

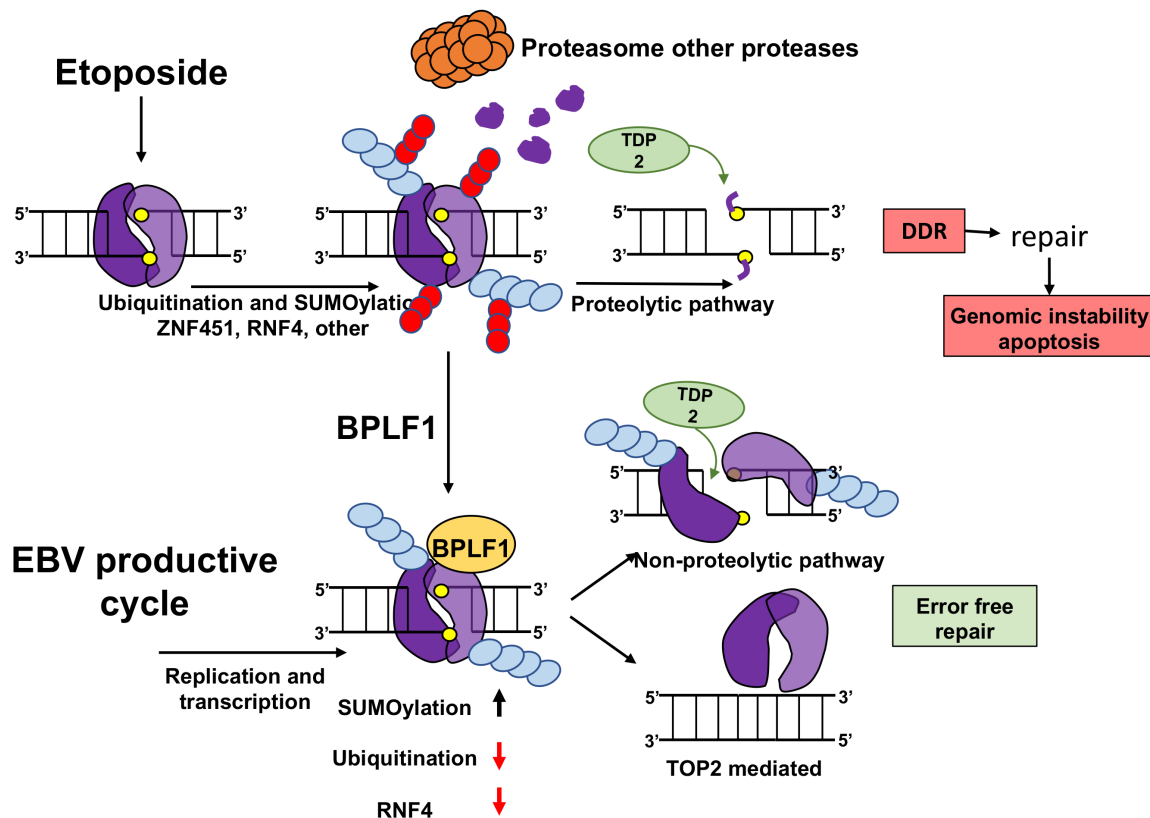

484

485 **Figure 6. Model of TOP2 regulation by the BPLF1.** TOP2 (violet) trapped in TOP2ccs  
486 (yellow) is targeted for proteasomal degradation via SUMOylation (light blue) and  
487 ubiquitination (red) mediated by the SUMO ligase ZNF451, the SUMO-targeting ubiquitin  
488 ligase RNF4 and other cellular ubiquitin ligases, leading to the display of partially digested 5'-  
489 phosphotyrosyl-DNA adducts. Processing by the TDP2 resolvase generates protein-free DSBs  
490 that trigger the DDR and error-free or error-prone DNA repair. Imprecise repair leads to  
491 apoptosis and genomic instability. BPLF1 inhibits the degradation of Etoposide-poisoned  
492 TOP2, which inhibits activation of the DDR. In the absence of proteasomal degradation,  
493 SUMOylation may alter the conformation of the TOP2 dimer allowing direct access of TDP2  
494 to the 5'-phosphotyrosyl-DNA bonds, which promotes error-free repair. During productive  
495 EBV infection, the concomitant expression of BPLF1 and downregulation of RNF4 favors the



496 *accumulation of SUMOylated TOP2 $\beta$  and the activation of non-proteolytic pathways for*  
497 *TOP2ccs debulking, which, in the absence of TOP2 poisons, may be mediated by TOP2 itself.*  
498 *This ensures the fidelity of virus replication and transcription and enhances cell survival and*  
499 *virus production.*

500

501

## 502 **Acknowledgements**

503 We are deeply grateful to Dr Arne Lindquist and Prof Nico Dantuma (CMB, Karolinska  
504 Institutet) for generously sharing knowledge and reagents and to Ms. Lisa Wohlgemuth (Ulm  
505 University, Germany) for technical assistance. This investigation was supported by grants  
506 awarded by the Swedish Cancer Society and The Medical Research Council. The work of SG  
507 and TH was partially supported by a grant awarded to the European ERA-NET eDEVILLI  
508 consortium.

## 509 **Materials and Methods**

510

### 511 *Chemicals*

512 IGEPAL CA-630 (NP40, I3021), Sodium dodecyl sulphate (SDS, L3771), N-Ethylmaleimide  
513 (NEM, E1271), Iodoacetamide (I1149), Sodium deoxycholate monohydrate ( D5670), Triton  
514 X-100 (T9284), Bovine serum albumin (BSA, A7906), Tween-20 (P9416), Trizma base (Tris,  
515 93349), Ethylenediaminetetraacetic acid disodium salt dehydrate (EDTA-E4884), Doxycycline  
516 cyclate (D9891), MG132 (M7449), Etoposide (E1383), Neocarzinostain (N9162) and  
517 Imidazole (I5513), were purchased from Sigma-Aldrich (St. Louis, MO, USA). RNase A  
518 (12091-021) and DNazol (10503027) were purchased from Invitrogen (Carlsbad, CA, USA).  
519 Micrococcal nuclease (88216) was from Thermo Fisher Scientific (Rockford, IL, USA).  
520 Complete protease inhibitors cocktail tablets (04693116001), and phosphatase inhibitor  
521 cocktail (04906837001) were from Roche Diagnostic (Mannheim, Germany). Camptothecin  
522 was purchased from Selleckchem (Munich, Germany).

523

### 524 *Antibodies*

525 The antibodies that were used in this study: mouse anti- $\beta$ -actin (AC-15, 1:20000) and mouse  
526 anti-FLAG (F-3165, 1:7000; IF 1:300) from Sigma-Aldrich; rabbit anti-TOP1 (A302-  
527 589A,1:5000), TOP2 $\alpha$  (A300-054A, 1:4000), TOP2 $\beta$  (A300-950A, 1:2000) and 53BP1(A300-  
528 272A,1:150) were from Bethyl Laboratories (Montgomery, Texas, USA); rabbit anti phospho-  
529 histone H2A.X clone 20E3 (#9718, IF:1:100) from Cell Signaling Technology (Danvers,  
530 Massachusetts); mouse monoclonal anti-ubiquitin (P4D1, sc-8017 1:1000), mouse anti-EBV-  
531 BZLF1 (sc-53904, 1:1000) and mouse anti-BRCA1 (D-9, sc-6954, IF 1:100) from Santa Cruz  
532 Biotechnology (Dallas, Texas, USA); mouse anti-SUMO2/3 (8A2, ab81371, 1:2000) from

533 Abcam (Cambridge, MA, USA); monoclonal rat anti-EBV-BPLF1 (1:1500) (van Gent et al.,  
534 2014) from the MAB core facility, Helmholtz Center, Munich, Germany; mouse anti-EBV-  
535 BMRF1(1:10000) and rat anti-EBV-BFRF3 (1:1000) from Dr. Jaap M. Middeldorp (VU  
536 University Medical Center, Amsterdam, Netherlands). Alexa Fluor anti-rabbit-488 (A31570,  
537 1:1000) and anti-mouse-555 (A315721, 1:1000) conjugated secondary antibodies raised in  
538 donkey were from Thermo Fisher (Waltham, Massachusetts, USA).

539

#### 540 *Plasmids and recombinant lentivirus vectors*

541 Eukaryotic expression vectors encoding the N-terminal domain of the EBV large tegument  
542 protein 3xFLAG-BPLF1 (amino acid 1-235) and the catalytic mutant BPLF1-C61A(Ascherio  
543 & Munger, 2015) and the bacterial expression vector His-BPLF1(Gupta et al., 2019) were  
544 described previously. Lentiviral vectors encoding N-terminal 3xFLAG and V5 tandem tagged  
545 versions of BPLF1 aa 1-325 and the corresponding catalytic mutant BPLF1-C61A under  
546 control of the doxycycline-inducible pTight promoter were produced by cloning the  
547 corresponding open reading frames(Ascherio & Munger, 2015) into ta modified version of the  
548 pCW57.1 plasmid (gift from David Root, Addgene plasmid #41393). The Gal1/10 His6 TEV  
549 Ura S. cerevisiae expression vector (12URA-B) was a gift from Scott Gradia (Addgene plasmid  
550 #48304) a plasmid expressing human TOP2 $\alpha$  was kindly provided by the James Berger (John  
551 Hopkins School of Medicine, Baltimore, USA). The FLAG-TOP2 $\alpha$  construct was created by  
552 in-frame cloning the 3xFLAG coding sequence (amino acids DYKDHDGDYKDHDID  
553 YKDDDDKLL) at the N-terminus of the TOP2 $\alpha$  open reading frame. All cloning was performed  
554 using the ligation independent cloning protocol from the QB3 Macrolab at Berkeley  
555 (macrolab.qb3.berkeley.edu). A recombinant lentivirus vector expressing the coding sequence  
556 of the EBV transactivator BZLF1 under control of a tetracycline-regulated promoter was  
557 constructed by cloning the open reading frame amplified with the primers 5'-

558 CGACCGGTATGATGGACCCAAACTCGAC-3' and 5'- CGACGCGTTTAGAAATTTAA  
559 GAGATCCTCGTGT-3' into the Age I and Mlu I sites of the pTRIPZ lentiviral vector (Thermo  
560 Fisher Scientific, USA). For virus production, HEK293FT cells were co-transfected with the  
561 pTRIPZ-BZLF1, psPAX and pMD2G plasmids (Addgene, Cambridge, MA) using JetPEI  
562 (Polyplus, Illkirch, France) according to the manufacture's protocol and cultured overnight in  
563 complete medium. After refreshing the medium, the cells were cultured for additional 48 h to  
564 allow virus production. Virus containing culture supernatant was briefly centrifuged and passed  
565 through a 0.45 µm filter to removed cell debris before aliquoting and storing at -80°C for future  
566 use.

567

### 568 *Cell lines and transfection*

569 HeLa cells (ATCC RR-B51S) and HEK293T (ATCC CRL3216) cell lines were cultured in  
570 Dulbecco's minimal essential medium (DMEM, Sigma-Aldrich), supplemented with 10% FBS  
571 (Gibco-Invitrogen) and 10 µg/ml ciprofloxacin (17850, Sigma-Aldrich) and grown in a 37°C  
572 incubator with 5% CO<sub>2</sub>. Stable HEK-rtTA-BPLF1/BPLF1-C61A cell lines were produced by  
573 lentiviral transduction followed by selection in medium containing 2µg/puromycin for 2 weeks.  
574 Expression of FLAG-BPLF1/BPLF1-C61A was induced by treatment with 1.5 µg/ml  
575 doxycycline and confirmed by anti-FLAG immunofluorescence and Western blot analysis.  
576 Clones expressing high levels of the transduced proteins were selected by limiting dilution.  
577 HeLa cells were transiently transfected with plasmids expressing FLAG-tagged version of  
578 BPLF1/BPLF1-C61A using the lipofectamine 2000 (Invitrogen, California, USA) or jetPEI®  
579 (Polyplus transfection, Illkirch FR) DNA transfection reagent according to the protocols  
580 recommended by the manufacturer.

581

### 582 *Production of EBV immortalized lymphoblastoid cell lines (LCLs)*

583 Peripheral blood mononuclear cells were purified from Buffy coats (Blood Bank, Karolinska  
584 University Hospital, Stockholm, Sweden) by Ficoll-Paque (Lymphoprep, Axis-shield PoC AS,  
585 Oslo, Norway) density gradient centrifugation, and B-cells were affinity-purified using CD19  
586 microbeads (MACS MicroBeads, Miltenyi Biotec, Bergisch Gladbach, Germany) resulting in  
587 >95% pure B-cell populations. Infectious EBV encoding wild type or catalytic mutant BPLF1  
588 were rescued for HEK293-EBV cells as previously described (Gupta et al., 2018). One million  
589 B-cells were incubated in 1 ml virus preparation for 1.5 h at 37°C, followed by the addition of  
590 fresh complete medium and incubation at 37°C in a 5% CO<sub>2</sub> incubator until immortalized LCLs  
591 were established. Sublines expressing a doxycycline-inducible BZLF1 transactivator were  
592 produced by culturing 10<sup>6</sup> LCL cells with the recombinant lentivirus in presence of 8 µg/ml  
593 polybrene (TR-1003-G, Sigma-Aldrich) for 24 hours followed by replacement of the infection  
594 medium with fresh complete medium. The transduced cells were selected in medium containing  
595 0.8 µg/ml (LCL-BPLF1) or 0.25 µg/ml (LCL-BPLF1-C61A) puromycin for one or two weeks.

596

### 597 *Immunofluorescence*

598 Transfected HeLa and HEK-Tta-BPLF1/BPLF1-C61A cells were grown on coverslips and  
599 induced with 1.5 µg/ml doxycycline for 24 h. For immunofluorescence analysis, the cells were  
600 fixed with 4% formaldehyde for 20 min, followed by permeabilization with 0.05% Triton X-  
601 100 in PBS for 5 min and blocking in PBS containing 4% bovine serum albumin for 40 min.  
602 After incubation for 1 h with primary antibodies and washing 3x5 min in PBS, the cells were  
603 incubated for 1 h with the appropriate Alexa Fluor-conjugated secondary antibodies, followed  
604 by washing and mounting in Vectashield-containing DAPI (Vector Laboratories, Inc.  
605 Burlingame, CA, USA). Images were acquired using a fluorescence microscope (Leica DM  
606 RA2, Leica Microsystems, Wetzlar, Germany) equipped with a CCD camera (C4742-95,  
607 Hamamatsu, Japan). Fluorescence intensity was quantified using the ImageJ® software.

608

### 609 *Western blots*

610 Cells were lysed in RIPA buffer (25 mM Tris•HCl pH 7.6, 150 mM NaCl, 1% Igepal, 1%  
611 sodium deoxycholate, 2% SDS) supplemented with protease inhibitor cocktail. Loading buffer  
612 (Invitrogen) was added to each sample followed by boiling for 10 min at 100°C. The lysates  
613 were fractionated in acrylamide Bis-Tris 4-12% gradient gel (Life Technologies Corporation,  
614 Carlsbad, USA). After transfer to PVDF membranes (Millipore Corporation, Billerica, MA,  
615 USA), the blots were blocked in TBS (VWR, Radnor, Pennsylvania, USA) containing 0.1%  
616 Tween-20 and 5% non-fat milk, and the membranes were incubated with the primary antibodies  
617 diluted in blocking buffer for 1 h at room temperature or over-night at 4°C followed by washing  
618 and incubation for 1 h with the appropriate horseradish peroxidase-conjugated secondary  
619 antibodies. The immunocomplexes were visualized by enhanced chemiluminescence (GE  
620 Healthcare AB, Uppsala, SE). For detecting topoisomerase-DNA adducts after treatment with  
621 topoisomerase poisons, the cells were lysed in alkaline buffer (Ban et al., 2013). Briefly, cells  
622 treated for the indicated time with 5 µM Camptothecine or 80 µM Etoposide were lysed in  
623 100 µl in buffer containing 200 mM NaOH, 2 mM EDTA, followed by the addition of 100 µl  
624 of 1M HEPES buffer (pH 7.4). Nucleic acids were removed by addition of 10 µl 100 mM  
625 CaCl<sub>2</sub>, 2 µl 1M DTT, and 200U of micrococcal nuclease followed by incubation at 37°C for  
626 20 min. Seventy µl of 4xLDS loading buffer (Invitrogen) were added to each sample followed  
627 by boiling for 10 min at 100°C before SDS-PAGE fractionation and western blot analysis.

628

### 629 *Immunoprecipitation and pull-down assays*

630 Cells were harvested 48h after transfection and lysed in NP40 lysis buffer (150 mM NaCl, 50  
631 mM Tris-HCl pH7.6, 5mM MgCl<sub>2</sub>, 1mM EDTA, 1% Igepal, 1 mM DTT, 10% glycerol)

632 supplemented with protease/phosphatase inhibitor cocktail, 20 mM NEM and 20 mM  
633 Iodoacetamide for 30 min on ice. For immunoprecipitations under denaturing condition the  
634 lysis buffer was supplemented with 1% SDS followed by dilution to 0.1% SDS. For  
635 BPLF1/BPLF1-C61A co-immunoprecipitation, the lysates were incubated for 3 h with 50  $\mu$ l  
636 anti-FLAG packed agarose affinity gel (A-2220; Sigma) at 4 °C with rotation. After washing  
637 4 times with lysis buffer, the immunocomplexes were eluted with FLAG peptide (F4799;  
638 Sigma). For TOP2 $\alpha$  and TOP2 $\beta$  immunoprecipitation, specific antibodies were added to cell  
639 lysates and incubated at 4°C for 3 h with rotation. The protein-antibody complexes were  
640 captured with protein-G coupled Sepharose beads (GE Healthcare) by incubation at 4 °C for 1  
641 h. The beads were washed 4 times with lysis buffer followed by boiling in 2xSDS-PAGE  
642 loading for 10 min at 100°C. The production of 6xHis-BPLF1 in bacteria and purification of  
643 the recombinant protein were done as previously described(Gupta et al., 2019). Recombinant  
644 human TOP2 $\alpha$  was expressed and purified according to a previously published protocol with  
645 slight modifications(Lee et al., 2017). Briefly, URA-deficient yeast (kindly provided by Lena  
646 Ström, CMB Karolinska Institutet) were transformed with the TOP2 $\alpha$  expression plasmid,  
647 grown initially in uracil-deficient media, then in YPLG (1% yeast extract, 2% peptone, 2%  
648 sodium DL-lactate, 1.5% glycerol) before induction of expression by addition of 2% galactose.  
649 The yeast was harvested by centrifugation and snap-frozen in liquid nitrogen. Proteins were  
650 extracted using a cryo-mill, and the filtered lysate was passed sequentially through HisTrap  
651 Excel nickel and HiTrap CP cation exchange columns (GE Healthcare) to purify the tagged  
652 TOP2 $\alpha$  protein before incubation overnight with His-tagged TEV protease. The following day,  
653 the protein was passed through a HisTrap column to remove the cleaved His-tag and the TEV  
654 protease. The TOP2 $\alpha$  protein was further purified on a Superdex 200 16/60 column,  
655 concentrated, and stored at -80°C. Relaxation and decatenation assays along with western  
656 blotting were performed to confirm protein purity and activity. Equimolar concentration of

657 purified His-BPLF1 (0.35  $\mu$ g) and FLAG-TOP2 $\alpha$  (2  $\mu$ g) were incubated in binding buffer (100  
658 mM NaCl, 50 mM Tris-HCl, 1mM DTT, 0.5% Igepal) for 20 min at 4°C. Anti-FLAG agarose  
659 affinity gel (A-2220; Sigma) or Ni-NTA beads (Qiagen) were added followed by incubation  
660 for 60 min or 20 min at 4°C with rotation. The beads were intensively washed, and bound  
661 proteins were eluted with FLAG peptide or 300 mM imidazole in buffer containing 50 mM  
662 Tris-HCl pH 7.6, 50 mM NaCl and 1 mM DTT.

663

#### 664 *Rapid approach to DNA adduct recovery (RADAR) assay*

665 TOP2ccs were isolated by RADAR assays as described(Kiianitsa & Maizels, 2013). Briefly,  
666 cells cultured in 6 well plates were treated with 80  $\mu$ M etoposide for 30 min or 4 h and then  
667 lysed in 800  $\mu$ l DNazol. Following the addition of 400  $\mu$ l absolute ethanol, the lysates were  
668 cooled at -20°C and then centrifuged at 14000 rpm for 20 min at 4°C. After repeated washing  
669 in 75% ethanol the nucleic acid pellets were dissolved in 100  $\mu$ l H<sub>2</sub>O at 37°C for 15 minutes,  
670 followed by treatment with 100  $\mu$ g/ml RNaseA. The concentration of DNA was measured and  
671 10  $\mu$ g DNA from each sample were treated with 250 U micrococcal nuclease supplemented  
672 with 5 mM CaCl<sub>2</sub> before the addition of loading buffer and detection of trapped protein by  
673 western blot.

674

#### 675 *Reverse transcription and real-time PCR*

676 Total RNA was isolated using the Quick-RNA MiniPrep kit (Zymo Research, Irvine, CA, USA)  
677 with in-column DNase treatment according to the instructions of the manufacturer. One  
678 microgram of total RNA was reverse transcribed using SuperScript VILO cDNA Synthesis kit  
679 (Invitrogen). PCR amplification was performed with the LC FastStart DNA master SYBR green  
680 I kit in a LightCycler 1.2 instrument (Roche Diagnostic) using the following specific primers:



681 TOP1 5'-AGTGGAAAGAAGTCCGGCATGA-3', 5'-GCCAGTCCTTCTCACCCCT TGAT-  
682 3'; TOP2 $\alpha$  5'-AAGCCCAGCAAAAAGGTTCCA-3', 5'-TGGCTTCAACAGCCTCCA AT-3';  
683 TOP2 $\beta$  5'-GGTTCGTGTAGAGGGGTCAA-3', 5'-CCCAGTTTCATCCAATTTGT C-3';  
684 BPLF1 5'-CATACACCGTGCGAAAAGAA-3', 5'-GATGGCGGGTAATACATGCT-3'; and  
685 MLN51 (Metastatic Lymph Node 51) 5'-CAAGGAAGGTCGTGCTGGTT-3', 5-AC  
686 CAGACCGGCCACCAT-3' as endogenous control gene. The PCR reactions were denatured at  
687 95°C for 10 min, followed by 40 cycles at 95°C for 8 sec, 60°C for 5 sec, 72°C for 8 sec. The  
688 relative levels of mRNA were determined from the standard curve using MLN51 as reference.

689

#### 690 *MTT assay*

691 For assay of cell viability,  $2 \times 10^4$  HEK-rtTABPLF1/BPLF1-C61A or  $5 \times 10^4$  LCLEBV-  
692 BPLF1/BPLF1-C61A were plated in 150  $\mu$ l medium in triplicate wells of a 96 well plate  
693 without or with the addition of the indicated concentrations of Etoposide. After incubation for  
694 20 h at 37°C in a 5% CO<sub>2</sub> incubator, 50  $\mu$ l culture medium containing 1 mg/ml  
695 Methylthiazolyldiphenyl-tetrazolium bromide (MTT, M5655, Sigma-Aldrich) were added to  
696 the wells followed by incubation for additional 4 h. The MTT formazan crystals produced by  
697 mitochondrial dehydrogenases in living cells were solubilized by the addition of 50  $\mu$ l 10%  
698 SDS and O.D. was measured at 540 nm in a plate reader. Relative viability was calculated after  
699 subtraction of the background O.D. of media alone.

700

#### 701 *EBV DNA replication and release of infectious virus*

702 Virus replication and the release of infectious virus were monitored after induction with 1.5  
703  $\mu$ g/ml Doxycycline for 3 days in cell pellets and culture supernatants by quantitative PCR.  
704 Briefly, DNA was isolated from cell pellets and culture supernatants cleared of cell debris by

705 centrifugation of 5 min at 14000 rpm and treated with 20 U/ml DNase I (Promega, Madison,  
706 WI, USA) to remove free viral DNA, using the DNeasy Blood & Tissue Kit (Qiagen, Hilden,  
707 Germany). Quantitative PCR was performed Quantitative PCR was performed as described  
708 above with primers specific for a unique sequence in EBNA1 5'-GGCAGTGGACCTCAAAG  
709 AAG-3', 5'-CTATGTCTTGGCCCTGATCC-3' and the cellular EF1 $\alpha$  (Elongation  
710 factor 1 $\alpha$ ) 5'-CTGAACCATCCAGGCCAAAT-3', 5'-GCCGTGTGGCAATCCAAT-3' as  
711 reference. Virus replication was calculated as the ratio between the amount of viral DNA in  
712 induced versus untreated cells.

713

714

715 **REFERENCES**

- 716 Anand, J., Sun, Y., Zhao, Y., Nitiss, K. C., & Nitiss, J. L. (2018). Detection of Topoisomerase  
717 Covalent Complexes in Eukaryotic Cells. *Methods Mol Biol*, 1703, 283-299.  
718 [https://doi.org/10.1007/978-1-4939-7459-7\\_20](https://doi.org/10.1007/978-1-4939-7459-7_20)  
719
- 720 Ascherio, A., & Munger, K. L. (2015). EBV and Autoimmunity. *Curr Top Microbiol Immunol*,  
721 390(Pt 1), 365-385. [https://doi.org/10.1007/978-3-319-22822-8\\_15](https://doi.org/10.1007/978-3-319-22822-8_15)  
722
- 723 Babcock, G. J., Decker, L. L., Volk, M., & Thorley-Lawson, D. A. (1998, Sep). EBV persistence in  
724 memory B cells in vivo. *Immunity*, 9(3), 395-404. [https://doi.org/10.1016/s1074-](https://doi.org/10.1016/s1074-7613(00)80622-6)  
725 [7613\(00\)80622-6](https://doi.org/10.1016/s1074-7613(00)80622-6)  
726
- 727 Bailey-Elkin, B. A., Knaap, R. C. M., Kikkert, M., & Mark, B. L. (2017, Nov 10). Structure and  
728 Function of Viral Deubiquitinating Enzymes. *J Mol Biol*, 429(22), 3441-3470.  
729 <https://doi.org/10.1016/j.jmb.2017.06.010>  
730
- 731 Ban, Y., Ho, C. W., Lin, R. K., Lyu, Y. L., & Liu, L. F. (2013, Oct). Activation of a novel ubiquitin-  
732 independent proteasome pathway when RNA polymerase II encounters a protein  
733 roadblock. *Mol Cell Biol*, 33(20), 4008-4016. <https://doi.org/10.1128/MCB.00403-13>  
734
- 735 Benson, J. D., & Huang, E. S. (1988, Dec). Two specific topoisomerase II inhibitors prevent  
736 replication of human cytomegalovirus DNA: an implied role in replication of the viral  
737 genome. *J Virol*, 62(12), 4797-4800. [https://doi.org/10.1128/JVI.62.12.4797-](https://doi.org/10.1128/JVI.62.12.4797-4800.1988)  
738 [4800.1988](https://doi.org/10.1128/JVI.62.12.4797-4800.1988)  
739
- 740 Benson, J. D., & Huang, E. S. (1990, Jan). Human cytomegalovirus induces expression of cellular  
741 topoisomerase II. *J Virol*, 64(1), 9-15. <https://doi.org/10.1128/JVI.64.1.9-15.1990>  
742
- 743 Borgermann, N., Ackermann, L., Schwertman, P., Hendriks, I. A., Thijssen, K., Liu, J. C., Lans, H.,  
744 Nielsen, M. L., & Mailand, N. (2019, Apr 15). SUMOylation promotes protective  
745 responses to DNA-protein crosslinks. *EMBO J*, 38(8).  
746 <https://doi.org/10.15252/embj.2019101496>  
747
- 748 Borozan, I., Zapatka, M., Frappier, L., & Ferretti, V. (2018, Jan 15). Analysis of Epstein-Barr  
749 Virus Genomes and Expression Profiles in Gastric Adenocarcinoma. *J Virol*, 92(2).  
750 <https://doi.org/10.1128/JVI.01239-17>  
751
- 752 Champoux, J. J. (2001). DNA topoisomerases: structure, function, and mechanism. *Annu Rev*  
753 *Biochem*, 70, 369-413. <https://doi.org/10.1146/annurev.biochem.70.1.369>  
754
- 755 Chen, T., Sun, Y., Ji, P., Kopetz, S., & Zhang, W. (2015, Jul 30). Topoisomerase IIalpha in  
756 chromosome instability and personalized cancer therapy. *Oncogene*, 34(31), 4019-  
757 4031. <https://doi.org/10.1038/onc.2014.332>  
758

- 759 Countryman, J., & Miller, G. (1985, Jun). Activation of expression of latent Epstein-Barr  
760 herpesvirus after gene transfer with a small cloned subfragment of heterogeneous  
761 viral DNA. *Proc Natl Acad Sci U S A*, 82(12), 4085-4089.  
762 <https://doi.org/10.1073/pnas.82.12.4085>  
763
- 764 Delgado, J. L., Hsieh, C. M., Chan, N. L., & Hiasa, H. (2018, Jan 23). Topoisomerases as  
765 anticancer targets. *Biochem J*, 475(2), 373-398. <https://doi.org/10.1042/BCJ20160583>  
766
- 767 Ebert, S. N., Shtrom, S. S., & Muller, M. T. (1990, Sep). Topoisomerase II cleavage of herpes  
768 simplex virus type 1 DNA in vivo is replication dependent. *J Virol*, 64(9), 4059-4066.  
769 <https://doi.org/10.1128/JVI.64.9.4059-4066.1990>  
770
- 771 Feederle, R., Kost, M., Baumann, M., Janz, A., Drouet, E., Hammerschmidt, W., & Delecluse, H.  
772 J. (2000, Jun 15). The Epstein-Barr virus lytic program is controlled by the co-operative  
773 functions of two transactivators. *EMBO J*, 19(12), 3080-3089.  
774 <https://doi.org/10.1093/emboj/19.12.3080>  
775
- 776 Gao, R., Schellenberg, M. J., Huang, S. Y., Abdelmalak, M., Marchand, C., Nitiss, K. C., Nitiss, J.  
777 L., Williams, R. S., & Pommier, Y. (2014, Jun 27). Proteolytic degradation of  
778 topoisomerase II (Top2) enables the processing of Top2.DNA and Top2.RNA covalent  
779 complexes by tyrosyl-DNA-phosphodiesterase 2 (TDP2). *J Biol Chem*, 289(26), 17960-  
780 17969. <https://doi.org/10.1074/jbc.M114.565374>  
781
- 782 Gastaldello, S., Chen, X., Callegari, S., & Masucci, M. G. (2013). Caspase-1 promotes Epstein-  
783 Barr virus replication by targeting the large tegument protein deneddylase to the  
784 nucleus of productively infected cells. *PLoS Pathog*, 9(10), e1003664.  
785 <https://doi.org/10.1371/journal.ppat.1003664>  
786
- 787 Gastaldello, S., Hildebrand, S., Faridani, O., Callegari, S., Palmkvist, M., Di Guglielmo, C., &  
788 Masucci, M. G. (2010, Apr). A deneddylase encoded by Epstein-Barr virus promotes  
789 viral DNA replication by regulating the activity of cullin-RING ligases. *Nat Cell Biol*,  
790 12(4), 351-361. <https://doi.org/10.1038/ncb2035>  
791
- 792 Gomez-Herreros, F., Romero-Granados, R., Zeng, Z., Alvarez-Quilon, A., Quintero, C., Ju, L.,  
793 Umans, L., Vermeire, L., Huylebroeck, D., Caldecott, K. W., & Cortes-Ledesma, F.  
794 (2013). TDP2-dependent non-homologous end-joining protects against topoisomerase  
795 II-induced DNA breaks and genome instability in cells and in vivo. *PLoS Genet*, 9(3),  
796 e1003226. <https://doi.org/10.1371/journal.pgen.1003226>  
797
- 798 Gomez-Herreros, F., Zagnoli-Vieira, G., Ntai, I., Martinez-Macias, M. I., Anderson, R. M.,  
799 Herrero-Ruiz, A., & Caldecott, K. W. (2017, Aug 10). TDP2 suppresses chromosomal  
800 translocations induced by DNA topoisomerase II during gene transcription. *Nat*  
801 *Commun*, 8(1), 233. <https://doi.org/10.1038/s41467-017-00307-y>  
802
- 803 Gupta, S., Yla-Anttila, P., Callegari, S., Tsai, M. H., Delecluse, H. J., & Masucci, M. G. (2018, Jan).  
804 Herpesvirus deconjugases inhibit the IFN response by promoting TRIM25

- 805 autoubiquitination and functional inactivation of the RIG-I signalosome. *PLoS Pathog*,  
806 14(1), e1006852. <https://doi.org/10.1371/journal.ppat.1006852>  
807
- 808 Gupta, S., Yla-Anttila, P., Sandalova, T., Sun, R., Achour, A., & Masucci, M. G. (2019, Nov). 14-  
809 3-3 scaffold proteins mediate the inactivation of trim25 and inhibition of the type I  
810 interferon response by herpesvirus deconjugases. *PLoS Pathog*, 15(11), e1008146.  
811 <https://doi.org/10.1371/journal.ppat.1008146>  
812
- 813 Hammarsten, O., Yao, X., & Elias, P. (1996, Jul). Inhibition of topoisomerase II by ICRF-193  
814 prevents efficient replication of herpes simplex virus type 1. *J Virol*, 70(7), 4523-4529.  
815 <https://www.ncbi.nlm.nih.gov/pubmed/8676478>  
816
- 817 Hammerschmidt, W., & Sugden, B. (2013, Jan 1). Replication of Epstein-Barr viral DNA. *Cold*  
818 *Spring Harb Perspect Biol*, 5(1), a013029.  
819 <https://doi.org/10.1101/cshperspect.a013029>  
820
- 821 Hoa, N. N., Shimizu, T., Zhou, Z. W., Wang, Z. Q., Deshpande, R. A., Paull, T. T., Akter, S., Tsuda,  
822 M., Furuta, R., Tsutsui, K., Takeda, S., & Sasanuma, H. (2016, Nov 3). Mre11 Is Essential  
823 for the Removal of Lethal Topoisomerase 2 Covalent Cleavage Complexes. *Mol Cell*,  
824 64(3), 580-592. <https://doi.org/10.1016/j.molcel.2016.10.011>  
825
- 826 Kattenhorn, L. M., Korbel, G. A., Kessler, B. M., Spooner, E., & Ploegh, H. L. (2005, Aug 19). A  
827 deubiquitinating enzyme encoded by HSV-1 belongs to a family of cysteine proteases  
828 that is conserved across the family Herpesviridae. *Mol Cell*, 19(4), 547-557.  
829 <https://doi.org/10.1016/j.molcel.2005.07.003>  
830
- 831 Kaufmann, S. H. (1998, Oct 1). Cell death induced by topoisomerase-targeted drugs: more  
832 questions than answers. *Biochim Biophys Acta*, 1400(1-3), 195-211.  
833 [https://doi.org/10.1016/s0167-4781\(98\)00136-5](https://doi.org/10.1016/s0167-4781(98)00136-5)  
834
- 835 Kawanishi, M. (1993, Oct). Topoisomerase I and II activities are required for Epstein-Barr virus  
836 replication. *J Gen Virol*, 74 ( Pt 10), 2263-2268. <https://doi.org/10.1099/0022-1317-74-10-2263>  
837  
838
- 839 Kawanishi, M. (1993). Topoisomerase I and II are required for Epstein-Barr virus replication. *J*  
840 *Gen Virol*, 74, 2263-2269. <https://doi.org/10.1099/0022-1317-74-10-2263>  
841
- 842 Kiianitsa, K., & Maizels, N. (2013, May). A rapid and sensitive assay for DNA-protein covalent  
843 complexes in living cells. *Nucleic Acids Res*, 41(9), e104.  
844 <https://doi.org/10.1093/nar/gkt171>  
845
- 846 Komander, D. (2009, Oct). The emerging complexity of protein ubiquitination. *Biochem Soc*  
847 *Trans*, 37(Pt 5), 937-953. <https://doi.org/10.1042/BST0370937>  
848
- 849 Kudoh, A., Fujita, M., Kiyono, T., Kuzushima, K., Sugaya, Y., Izuta, S., Nishiyama, Y., & Tsurumi,  
850 T. (2003, Jan). Reactivation of lytic replication from B cells latently infected with  
851 Epstein-Barr virus occurs with high S-phase cyclin-dependent kinase activity while

- 852 inhibiting cellular DNA replication. *J Virol*, 77(2), 851-861.  
853 <https://doi.org/10.1128/jvi.77.2.851-861.2003>  
854
- 855 Lee, J. H., Wendorff, T. J., & Berger, J. M. (2017, Dec 22). Resveratrol: A novel type of  
856 topoisomerase II inhibitor. *Journal of Biological Chemistry*, 292(51), 21011-21022.  
857 <https://doi.org/10.1074/jbc.M117.810580>  
858
- 859 Lee, K. C., Bramley, R. L., Cowell, I. G., Jackson, G. H., & Austin, C. A. (2016, Mar 1). Proteasomal  
860 inhibition potentiates drugs targeting DNA topoisomerase II. *Biochem Pharmacol*, 103,  
861 29-39. <https://doi.org/10.1016/j.bcp.2015.12.015>  
862
- 863 Li, J., Callegari, S., & Masucci, M. G. (2017, Apr). The Epstein-Barr virus miR-BHRF1-1 targets  
864 RNF4 during productive infection to promote the accumulation of SUMO conjugates  
865 and the release of infectious virus. *PLoS Pathog*, 13(4), e1006338.  
866 <https://doi.org/10.1371/journal.ppat.1006338>  
867
- 868 Lopez-Mosqueda, J., Maddi, K., Prgomet, S., Kalayil, S., Marinovic-Terzic, I., Terzic, J., & Dikic,  
869 I. (2016, Nov 17). SPRTN is a mammalian DNA-binding metalloprotease that resolves  
870 DNA-protein crosslinks. *Elife*, 5. <https://doi.org/10.7554/eLife.21491>  
871
- 872 Madabhushi, R. (2018, Jun 29). The Roles of DNA Topoisomerase IIbeta in Transcription. *Int J*  
873 *Mol Sci*, 19(7). <https://doi.org/10.3390/ijms19071917>  
874
- 875 Mah, L. J., El-Osta, A., & Karagiannis, T. C. (2010, Apr). gammaH2AX: a sensitive molecular  
876 marker of DNA damage and repair. *Leukemia*, 24(4), 679-686.  
877 <https://doi.org/10.1038/leu.2010.6>  
878
- 879 Mao, Y., Desai, S. D., Ting, C. Y., Hwang, J., & Liu, L. F. (2001, Nov 2). 26 S proteasome-mediated  
880 degradation of topoisomerase II cleavable complexes. *J Biol Chem*, 276(44), 40652-  
881 40658. <https://doi.org/10.1074/jbc.M104009200>  
882
- 883 McKinnon, P. J. (2016, Nov). Topoisomerases and the regulation of neural function. *Nat Rev*  
884 *Neurosci*, 17(11), 673-679. <https://doi.org/10.1038/nrn.2016.101>  
885
- 886 Morimoto, S., Tsuda, M., Bunch, H., Sasanuma, H., Austin, C., & Takeda, S. (2019, Oct 30). Type  
887 II DNA Topoisomerases Cause Spontaneous Double-Strand Breaks in Genomic DNA.  
888 *Genes (Basel)*, 10(11). <https://doi.org/10.3390/genes10110868>  
889
- 890 Munz, C. (2019, Nov). Latency and lytic replication in Epstein-Barr virus-associated  
891 oncogenesis. *Nat Rev Microbiol*, 17(11), 691-700. <https://doi.org/10.1038/s41579-019-0249-7>  
892
- 893
- 894 Murata, T. (2014, Jun). Regulation of Epstein-Barr virus reactivation from latency. *Microbiol*  
895 *Immunol*, 58(6), 307-317. <https://doi.org/10.1111/1348-0421.12155>  
896

- 897 Nimonkar, A. V., & Boehmer, P. E. (2004, May 21). Role of protein-protein interactions during  
898 herpes simplex virus type 1 recombination-dependent replication. *J Biol Chem*,  
899 279(21), 21957-21965. <https://doi.org/10.1074/jbc.M400832200>  
900
- 901 Nitiss, J. L. (2009, May). DNA topoisomerase II and its growing repertoire of biological  
902 functions. *Nat Rev Cancer*, 9(5), 327-337. <https://doi.org/10.1038/nrc2608>  
903
- 904 Peng, R. J., Han, B. W., Cai, Q. Q., Zuo, X. Y., Xia, T., Chen, J. R., Feng, L. N., Lim, J. Q., Chen, S.  
905 W., Zeng, M. S., Guo, Y. M., Li, B., Xia, X. J., Xia, Y., Laurensia, Y., Chia, B. K. H., Huang,  
906 H. Q., Young, K. H., Lim, S. T., Ong, C. K., Zeng, Y. X., & Bei, J. X. (2019, Jun). Genomic  
907 and transcriptomic landscapes of Epstein-Barr virus in extranodal natural killer T-cell  
908 lymphoma. *Leukemia*, 33(6), 1451-1462. <https://doi.org/10.1038/s41375-018-0324-5>  
909
- 910 Perry, M., Sundeep Kollala, S., Beigert, M., Su, G., Kodavati, M., Mallard, H., Kreling, N.,  
911 Holfrook, A., & Ghosal, G. (2020). USP11 deubiquitinates monoubiquitinated SPRTN to  
912 repair DNA-protein crosslinks. *bioRxiv*, <https://doi.org/10.1101/2020.06.30.180471>.  
913
- 914 Pommier, Y. (2013, Jan 18). Drugging topoisomerases: lessons and challenges. *ACS Chem Biol*,  
915 8(1), 82-95. <https://doi.org/10.1021/cb300648v>  
916
- 917 Pommier, Y., Huang, S. Y., Gao, R., Das, B. B., Murai, J., & Marchand, C. (2014, Jul). Tyrosyl-  
918 DNA-phosphodiesterases (TDP1 and TDP2). *DNA Repair (Amst)*, 19, 114-129.  
919 <https://doi.org/10.1016/j.dnarep.2014.03.020>  
920
- 921 Povirk, L. F. (1996, Aug 17). DNA damage and mutagenesis by radiomimetic DNA-cleaving  
922 agents: bleomycin, neocarzinostatin and other enediynes. *Mutat Res*, 355(1-2), 71-89.  
923 [https://doi.org/10.1016/0027-5107\(96\)00023-1](https://doi.org/10.1016/0027-5107(96)00023-1)  
924
- 925 Schellenberg, M. J., Lieberman, J. A., Herrero-Ruiz, A., Butler, L. R., Williams, J. G., Munoz-  
926 Cabello, A. M., Mueller, G. A., London, R. E., Cortes-Ledesma, F., & Williams, R. S. (2017,  
927 Sep 29). ZATT (ZNF451)-mediated resolution of topoisomerase 2 DNA-protein cross-  
928 links. *Science*, 357(6358), 1412-1416. <https://doi.org/10.1126/science.aam6468>  
929
- 930 Sciascia, N., Wu, W., Zong, D., Sun, Y., Wong, N., John, S., Wangsa, D., Ried, T., Bunting, S. F.,  
931 Pommier, Y., & Nussenzweig, A. (2020, Feb 14). Suppressing proteasome mediated  
932 processing of topoisomerase II DNA-protein complexes preserves genome integrity.  
933 *Elife*, 9. <https://doi.org/10.7554/eLife.53447>  
934
- 935 Shannon-Lowe, C., & Rickinson, A. (2019). The Global Landscape of EBV-Associated Tumors.  
936 *Front Oncol*, 9, 713. <https://doi.org/10.3389/fonc.2019.00713>  
937
- 938 Stinglele, J., Bellelli, R., Alte, F., Hewitt, G., Sarek, G., Maslen, S. L., Tsutakawa, S. E., Borg, A.,  
939 Kjaer, S., Tainer, J. A., Skehel, J. M., Groll, M., & Boulton, S. J. (2016, Nov 17).  
940 Mechanism and Regulation of DNA-Protein Crosslink Repair by the DNA-Dependent  
941 Metalloprotease SPRTN. *Mol Cell*, 64(4), 688-703.  
942 <https://doi.org/10.1016/j.molcel.2016.09.031>  
943

- 944 Sun, Y., Miller Jenkins, L. M., Su, Y. P., Nitiss, K. C., Nitiss, J. L., & Pommier, Y. (2020, Nov). A  
945 conserved SUMO pathway repairs topoisomerase DNA-protein cross-links by engaging  
946 ubiquitin-mediated proteasomal degradation. *Sci Adv*, 6(46).  
947 <https://doi.org/10.1126/sciadv.aba6290>  
948
- 949 Sun, Y., Saha, L. K., Saha, S., Jo, U., & Pommier, Y. (2020, Oct). Debulking of topoisomerase  
950 DNA-protein crosslinks (TOP-DPC) by the proteasome, non-proteasomal and non-  
951 proteolytic pathways. *DNA Repair (Amst)*, 94, 102926.  
952 <https://doi.org/10.1016/j.dnarep.2020.102926>  
953
- 954 van Gent, M., Braem, S. G., de Jong, A., Delagic, N., Peeters, J. G., Boer, I. G., Moynagh, P. N.,  
955 Kremmer, E., Wiertz, E. J., Ovaa, H., Griffin, B. D., & Rensing, M. E. (2014, Feb). Epstein-  
956 Barr virus large tegument protein BPLF1 contributes to innate immune evasion  
957 through interference with toll-like receptor signaling. *PLoS Pathog*, 10(2), e1003960.  
958 <https://doi.org/10.1371/journal.ppat.1003960>  
959
- 960 Wang, J. C. (2002, Jun). Cellular roles of DNA topoisomerases: a molecular perspective. *Nat*  
961 *Rev Mol Cell Biol*, 3(6), 430-440. <https://doi.org/10.1038/nrm831>  
962
- 963 Wang, P., Rennekamp, A. J., Yuan, Y., & Lieberman, P. M. (2009, Aug). Topoisomerase I and  
964 RecQL1 function in Epstein-Barr virus lytic reactivation. *J Virol*, 83(16), 8090-8098.  
965 <https://doi.org/10.1128/JVI.02379-08>  
966
- 967 Wang, Y., Li, H., Tang, Q., Maul, G. G., & Yuan, Y. (2008, Mar). Kaposi's sarcoma-associated  
968 herpesvirus ori-Lyt-dependent DNA replication: involvement of host cellular factors. *J*  
969 *Virology*, 82(6), 2867-2882. <https://doi.org/10.1128/JVI.01319-07>  
970
- 971



1 **SUPPLEMENTARY FIGURES**

2

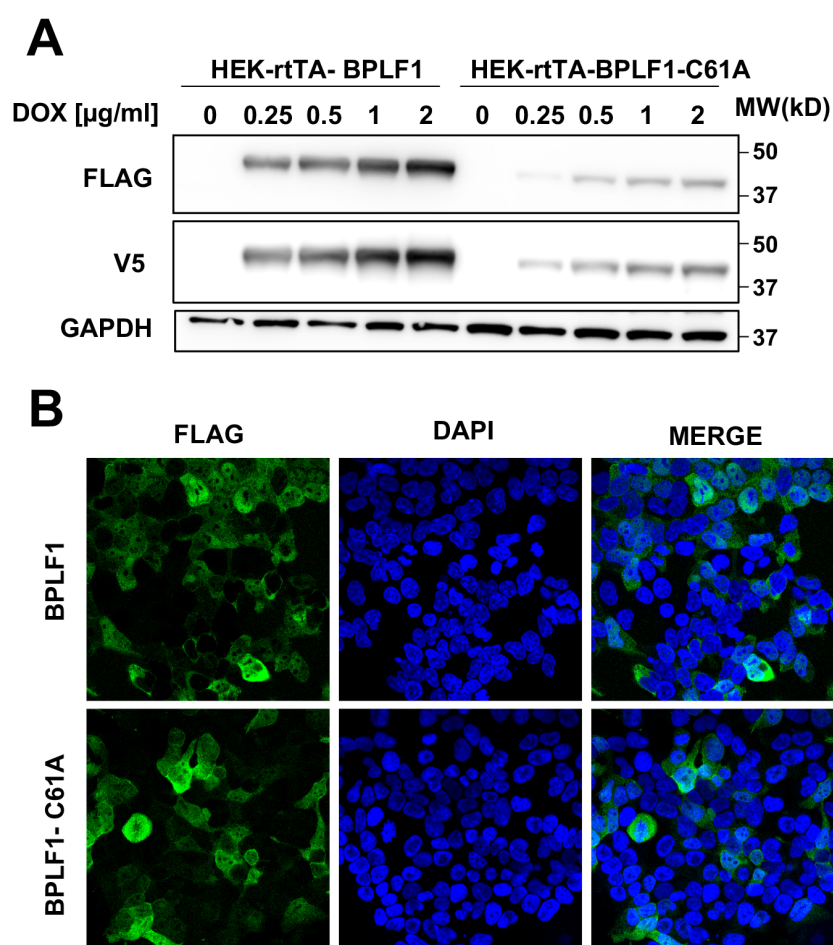

3

4 **Figure S1. Characterization of the HEK-rtTA-BPLF1/BPLF1-C61A cell lines. A)**  
5 Expression of BPLF1/BPLF1-C61A was detected in western blots of cells treated for 24 h with  
6 the indicated amount of Dox using antibodies to the FLAG tag. Lower steady-state levels of  
7 BPLF1-C61A were usually detected due to rapid protein turnover. **B)** Representative  
8 micrographs illustrating the expression of BPLF1/BPLF1C61A in untreated and Dox-treated  
9 cells. Confocal images were obtained at 40x lens objective magnification. BPLF1 is in green  
10 and cell nuclei were stained with DAPI (blue). Strong FLAG fluorescence was detected in  
11 approximately 50% of the induced cells.

12

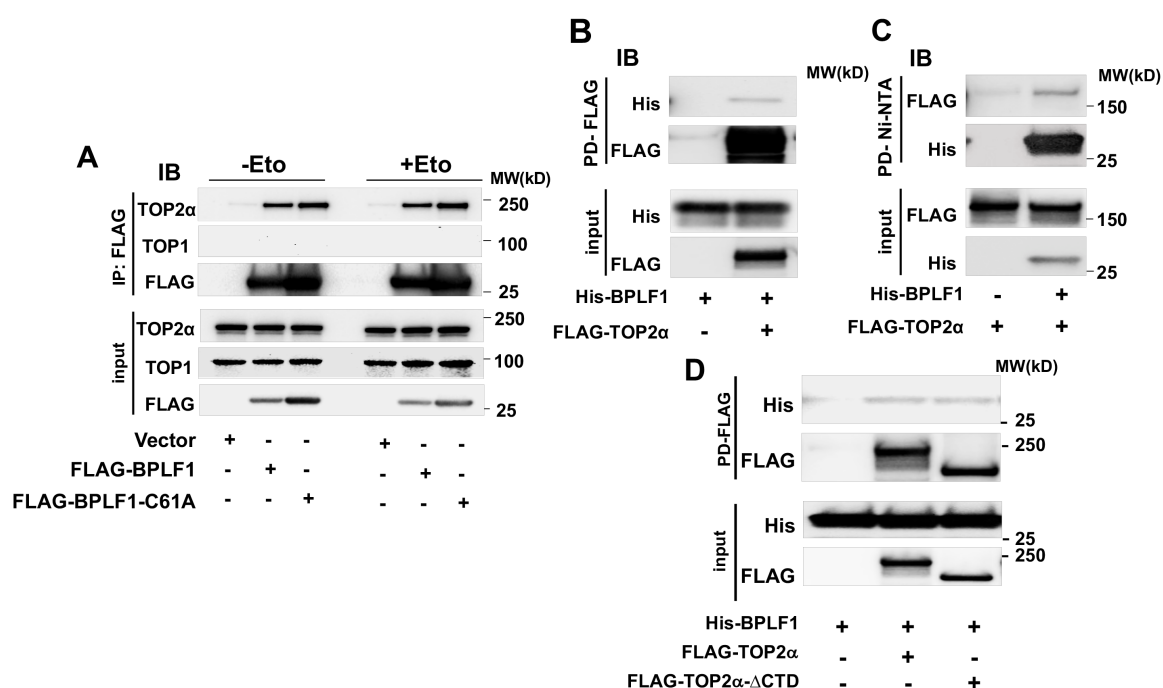

13

14 **Figure S2. BPLF1 does not interact with TOP1 and recombinant BPLF1 binds to TOP2.**

15 **(A)** HEK293T cells were transfected with FLAG-BPLF1, FLAG-BPLF1-C61A, or empty

16 FLAG-vector and then treated with 40  $\mu$ M Etoposide for 30 min. Cell lysates were

17 immunoprecipitated with anti-FLAG conjugated agarose beads and western blots were probed

18 with the indicated antibodies. TOP2 $\alpha$  was readily detected in the immunoprecipitates while

19 TOP1 was consistently absent. Representative western blots from one of two independent

20 experiments giving similar results are shown. **(B,C,D)** The interaction of yeast expressed

21 FLAG-TOP2 $\alpha$  or TOP2 $\alpha$  lacking the C-terminal domain (FLAG-TOP2 $\alpha$ - $\Delta$ CTD) with

22 bacterially expressed His-BPLF1 was assayed in pull-down assays. Equimolar amounts of the

23 proteins were mixed and FLAG **(B, D)** or Ni-NTA **(C)** pull-downs were probed with antibodies

24 specific for FLAG or BPLF1. A weak interaction of BPLF1 with TOP2 $\alpha$  was detected

25 independently of the presence of the TOP2 $\alpha$  C-terminal domain. Western blots from one

26 representative experiment out of two are shown in the figure.

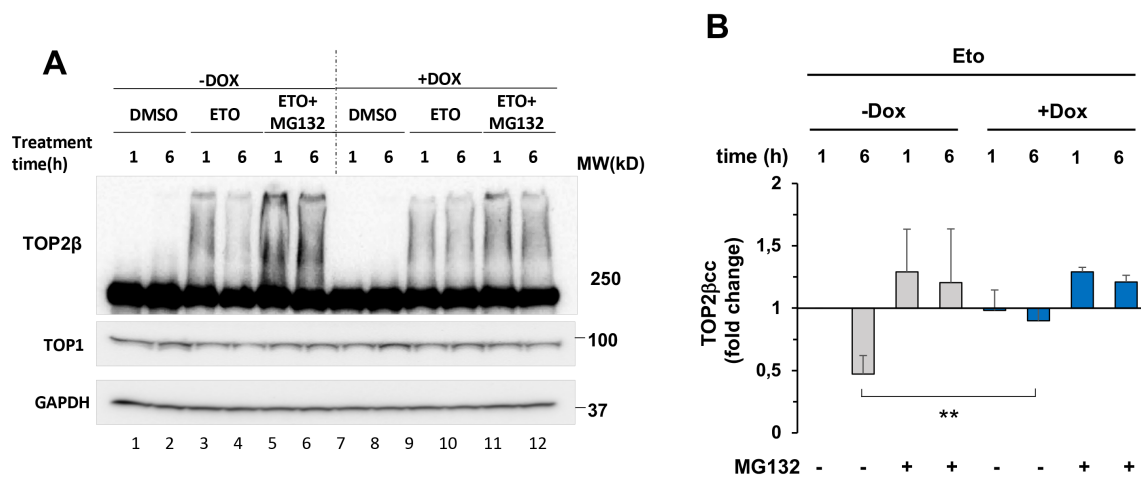

27

28 **Figure S3. BPLF1 inhibits the resolution of TOP2cc.** (A) HEK-rtTA-BPLF1 cells were

29 cultured with or without 1.5µg/ml Dox for 24 h and then treated with 80 µM Etoposide alone

30 or together with 10 µM MG132. Cells harvested after 1 h or 6 h were lysed in alkaline buffer

31 and the formation of TOP2cc was investigated by probing western blots with the TOP2β

32 antibody. The TOP2cc are visualized as smears of DNA cross-linked TOP2β above the main

33 band. Probing with the anti-TOP1 antibody confirmed the selective induction of TOP2βcc in

34 Etoposide treated cells. GAPDH was used as the loading control. Western blots from one

35 representative of three independent experiments are shown in the figure. (B) Densitometry

36 quantification confirming the stabilization and TOP2βcc in BPLF1 expressing cells. The mean

37 ± SD of two independent experiments is shown. \*\*P<0.01

38

39

40

41

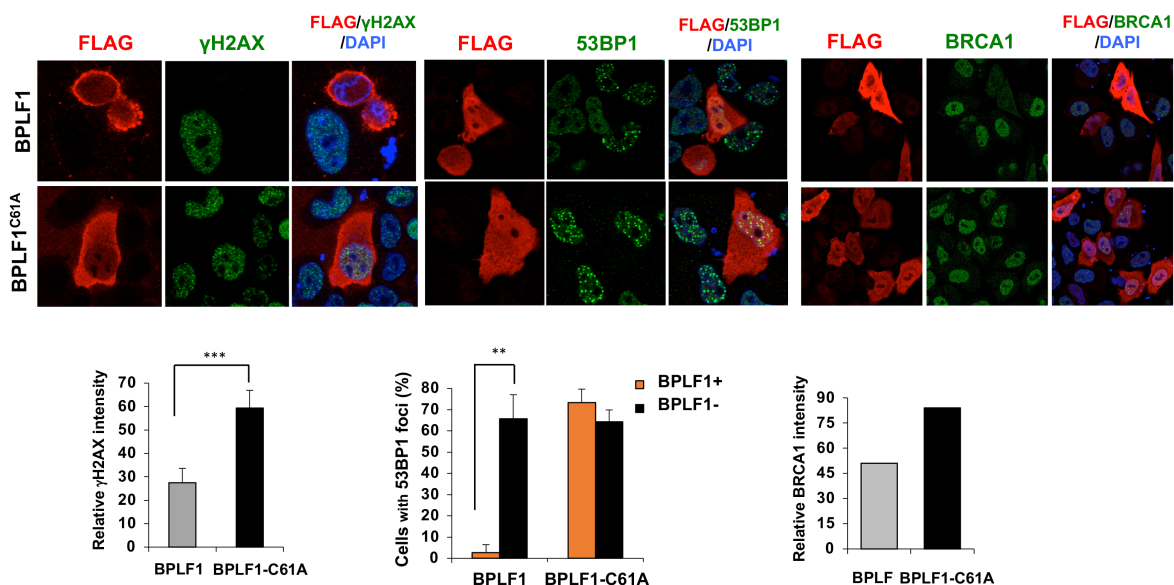

42

43 **Figure S4. Transfection of catalytically active BPLF1 inhibits activation of the DDR and**  
44 **DNA repair in etoposide treated HeLa cells.** HeLa cells transiently transfected with plasmids  
45 expressing FLAG-BPLF1/BPLF1-C61A were treated for 6 h with 40  $\mu$ M etoposide before  
46 fixation and staining with the indicated antibodies. Representative micrographs of cells co-  
47 stained with antibodies to FLAG, the DNA-DSB maker  $\gamma$ H2AX, and the DNA repair markers  
48 53BP1 and BRCA1. Expression of catalytically active BPLF1 was associated with decrease  
49  $\gamma$ H2AX and BRCA1 fluorescence and failure to accumulate 53BP1 foci. Images from one  
50 representative experiment out of three are shown. The intensity of  $\gamma$ H2AX and BRCA1  
51 fluorescence and the number of cells showing  $\geq 2$  53BP1 foci were quantified in BPLF1  
52 positive and negative cells from the same transfection experiment using the ImageJ software.  
53 Mean  $\pm$  SD of two or three independent experiments where a minimum of 50 BPLF1 positive  
54 and 50 BPLF1 negative cells was scored in each condition.

55

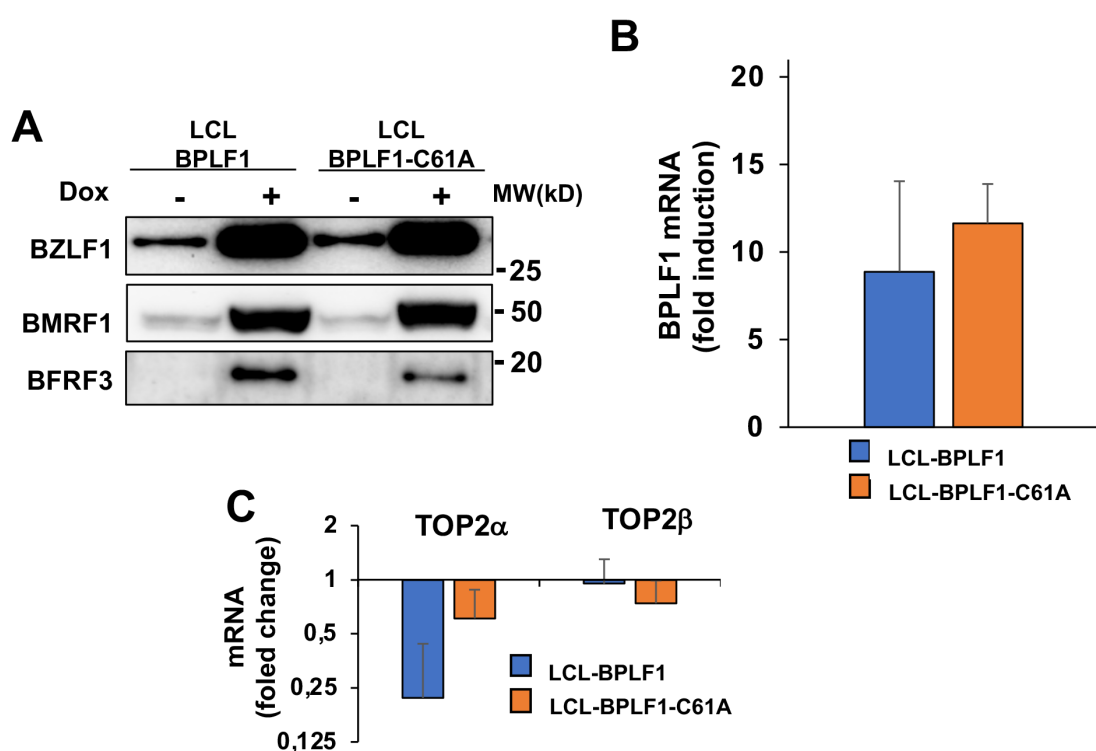

56

57 **Figure S5. Induction of the productive virus cycle and quantification of TOP2 mRNA in**  
58 **LCLs carrying recombinant EBV expressing wild type and mutant BPLF1.** The  
59 productive cycle was induced in LCL-EBV-BPLF1/BPLF1-C61A by culture for 72 h in the  
60 presence of 1.5  $\mu\text{g/ml}$  Dox. **(A)** Viral gene expression was assessed by probing western blots  
61 of total cell lysates with the indicated antibodies to the immediate early antigen BZLF1, the  
62 early antigen BMRF1 and the late antigen BFRF3. The expression of BPLF1 **(B)**, TOP2 $\alpha$  and  
63 TOP2 $\beta$  **(C)** mRNA was quantified by qPCR. The mean  $\pm$  SD fold increase relative to  
64 uninduced controls recorded in three independent experiments is shown in the figure.

65
